# Reduced B Lymphoid Kinase (Blk) Expression Enhances Proinflammatory Cytokine Production and Induces Nephrosis in C57BL/6-*lpr/lpr* Mice

Elizabeth M. Samuelson<sup>1</sup><sup>‡a</sup>, Renee M. Laird<sup>1</sup><sup>‡b</sup>, Amber M. Papillion<sup>1</sup>, Arthur H. Tatum<sup>2</sup>, Michael F. Princiotta<sup>1</sup>, Sandra M. Hayes<sup>1\*</sup>

**1** Department of Microbiology and Immunology, State University of New York Upstate Medical University, Syracuse, New York, United States of America, **2** Department of Pathology, State University of New York Upstate Medical University, Syracuse, New York, United States of America

## Abstract

*BLK*, which encodes B lymphoid kinase, was recently identified in genome wide association studies as a susceptibility gene for systemic lupus erythematosus (SLE), and risk alleles mapping to the *BLK* locus result in reduced gene expression. To determine whether *BLK* is indeed a *bona fide* susceptibility gene, we developed an experimental mouse model, namely the *Blk*<sup>+/-</sup>.*lpr/lpr* (*Blk*<sup>+/-</sup>.*lpr*) mouse, in which *Blk* expression levels are reduced to levels comparable to those in individuals carrying a risk allele. Here, we report that *Blk* is expressed not only in B cells, but also in IL-17-producing  $\gamma\delta$  and DN  $\alpha\beta$  T cells and in plasmacytoid dendritic cells (pDCs). Moreover, we found that solely reducing *Blk* expression in C57BL/6-*lpr/lpr* mice enhanced proinflammatory cytokine production and accelerated the onset of lymphoproliferation, proteinuria, and kidney disease. Together, these findings suggest that *BLK* risk alleles confer susceptibility to SLE through the dysregulation of a proinflammatory cytokine network.

**Citation:** Samuelson EM, Laird RM, Papillion AM, Tatum AH, Princiotta MF, et al. (2014) Reduced B Lymphoid Kinase (*Blk*) Expression Enhances Proinflammatory Cytokine Production and Induces Nephrosis in C57BL/6-*lpr/lpr* Mice. PLoS ONE 9(3): e92054. doi:10.1371/journal.pone.0092054

**Editor:** Pierre Bobé, INSERM-Université Paris-Sud, France

**Received:** October 25, 2013; **Accepted:** February 18, 2014; **Published:** March 17, 2014

**Copyright:** © 2014 Samuelson et al. This is an open-access article distributed under the terms of the Creative Commons Attribution License, which permits unrestricted use, distribution, and reproduction in any medium, provided the original author and source are credited.

**Funding:** This work was supported by grants from the National Institutes of Health (R21 AI097694 and R56 AI091908). The funders had no role in study design, data collection and analysis, decision to publish, or preparation of the manuscript.

**Competing Interests:** The authors have declared that no competing interests exist.

\* E-mail: HayesSa@upstate.edu

‡ These authors contributed equally to this work.

‡a Current address: Benaroya Research Institute, Seattle, Washington, United States of America

‡b Current address: Naval Medical Research Center, Silver Spring, Maryland, United States of America

## Introduction

Systemic lupus erythematosus (SLE) is a chronic multisystem autoimmune disorder that afflicts more than 1.5 million Americans. There is strong evidence for a genetic basis to this disease, and many candidate genes, which predispose an individual to SLE, have been identified from studies in patients with SLE and in mouse models of lupus [1–3]. With recent advances, however, such as the completion of the Human Genome Project and the International HapMap Project, it is now possible to perform genome-wide association studies to identify additional susceptibility genes in humans. Indeed, several groups, using this experimental approach, have identified and confirmed over 25 new susceptibility genes in SLE patients of different ethnicity and race [4–10]. Notably, many of these new susceptibility genes are not among those known to be associated with autoimmune disease; therefore, follow-up studies are necessary to determine the mechanisms by which they promote development of SLE.

One of the newly identified susceptibility genes is *BLK*, which encodes B lymphoid kinase (Blk). Multiple single nucleotide polymorphisms (SNPs) in the *BLK* locus, mapping primarily to the promoter and first intron, are associated with disease risk [4–10]. A handful of these SNPs have been studied in more depth to determine how the specific nucleotide change affects *BLK*

expression. All studies to date report a 25 to 70% reduction in *BLK* expression depending on whether individuals are heterozygous or homozygous for the risk allele [5,11–13]. These findings suggest that the genetic variants in the *BLK* locus predispose an individual to SLE by reducing *Blk* expression.

*Blk* was first described over two decades ago as a B cell-specific member of the Src family of tyrosine kinases (SFKs) [14]. Even though early reports demonstrated functional redundancy among *Blk*, *Lyn*, and *Fyn* in B cell development and activation [15,16], a recent report has revealed a requirement for wild-type levels of *Blk* in the development and function of marginal zone (MZ) B cells [17], a mature splenic B cell subset involved in both microbial immunity and autoimmunity [18]. In both *Blk*<sup>+/-</sup> and *Blk*<sup>-/-</sup> mice, MZ B cells are fewer in number but exhibit augmented *in vitro* and *in vivo* responses to BCR stimulation in comparison to *Blk*<sup>+/+</sup> mice [17]. With age, this B cell hyperactivity leads to autoimmunity, as evidenced by the display of multiple autoimmune phenotypes in 6-month-old *Blk*<sup>+/-</sup> mice, including increased numbers of MZ and B1 B cells, detection of B cells with an activated surface phenotype, and production of a low but significant level of serum anti-nuclear antibodies (ANAs) [17]. Given the well-documented role of B cells in autoimmune disease development and pathogenesis [19], these data suggest that *BLK* risk alleles promote development of SLE by altering BCR

signaling responses and, by extension, B cell development, function, and tolerance.

It is important to note that Blk is also expressed outside of the B cell lineage, in both immune and non-immune cells. In humans, Blk is expressed in unfractionated thymocytes,  $\gamma\delta$  T cells, plasmacytoid dendritic cells (pDCs), and pancreatic  $\beta$  cells [13,20–22], while in mice, it is expressed in bone marrow progenitor cells, immature CD4<sup>-</sup> CD8<sup>-</sup> (double negative; DN) thymocytes,  $\gamma\delta$  thymocytes, IL-17-producing  $\gamma\delta$  T ( $\gamma\delta$ -17) cells, and pancreatic  $\beta$  cells [22,23]. More importantly, analysis of Blk-deficient mice has revealed a requirement for Blk not only in early T cell development but also in the development and function of  $\gamma\delta$ -17 cells [23]. Therefore, because Blk is expressed in a diverse array of immune cells, it is conceivable that reducing its expression could have wide-ranging effects on immune cell development, activation, and effector function.

To determine whether and how reduced Blk expression levels contribute to autoimmune disease development and pathogenesis, we established an experimental mouse model in which *Blk* transcript and Blk protein levels are reduced by approximately 45% [17], which is within the range reported for individuals carrying a *BLK* risk allele [5,11–13]. In addition, the mouse model carries the *lpr* mutation in Fas, which not only results in severely reduced Fas expression but also accelerates the development of disease when introgressed on an autoimmune susceptible background [24,25]. We present here that, in addition to B cells and  $\gamma\delta$ -17 cells, Blk is expressed in murine pDCs and in IL-17-producing DN  $\alpha\beta$  T (DN-17) cells. Furthermore, we found that solely reducing Blk expression in B6.*lpr* mice enhanced proinflammatory cytokine production by both Blk-positive and -negative immune cells and accelerated the onset of lymphoproliferation, proteinuria, and kidney disease. These findings demonstrate that *BLK* is indeed a *bona fide* susceptibility gene and suggest that *BLK* risk alleles promote autoimmune disease development through the dysregulation of a proinflammatory cytokine network.

## Materials and Methods

### Ethics statement

All research involving animals has been conducted according to the relevant national and international guidelines with respect to husbandry, experimentation and welfare. Mouse protocols were approved by the State University of New York (SUNY) Upstate Medical University Committee on the Humane Use of Animals (CHUA protocol numbers 262 and 368).

### Mice

C57BL/6J (B6) and B6.MRL-*Fas*<sup>*lpr*</sup>/J (B6.*lpr*) mice were purchased from The Jackson Laboratory (Bar Harbor, ME, USA). B6.*Blk*<sup>*tm1*</sup> (Blk<sup>-/-</sup>) mice [15] were provided by A. Tarakhovsky (Rockefeller University) and V<sub>H</sub>3H9 site directed-transgenic (3H9 Tg) mice [26] on the B6 background were provided by M. G. Weigert (University of Chicago). All mice used in this study were bred and maintained in a barrier facility in the Department of Laboratory Animal Resources at SUNY Upstate Medical University in accordance with the specifications of the Association for Assessment and Accreditation of Laboratory Animal Care.

### Flow cytometric analysis

Flow cytometric analysis for surface antigen expression was performed by pre-incubating cells with the anti-CD16/CD32 antibody for at least 10 minutes to block non-specific binding of immunoglobulins to Fc receptors, followed by staining with

fluorochrome-conjugated mAbs against various surface antigens. Intracellular staining for Blk, ROR $\gamma$ t, T-bet, and Foxp3 was performed using the Foxp3/Transcription factor staining buffer set (eBioscience, San Diego, CA, USA) according to the manufacturer's instructions. Intracellular staining for IL-6, TNF $\alpha$ , IL-17A, IFN $\gamma$ , and IL-10 was performed by first fixing cells in a final concentration of 1.5% formaldehyde for 10 minutes at 37°C. Fixed cells were stained for surface antigens, permeabilized with Perm/Wash Buffer (BD Pharmingen, San Jose, CA, USA) for 20 minutes at 4°C, and then stained with antibodies against the appropriate cytokines. For all experiments, 0.5 to 1  $\times$  10<sup>6</sup> cells were acquired on a BD LSRFortessa using FACSDiva software (BD Immunocytometry Systems, San Jose, CA, USA). Data analysis was performed using FlowJo software (Tree Star, Inc., Ashland, OR, USA). Dead cells were excluded from analysis based on forward and side scatter profiles.

Antibodies used for flow cytometric analysis included anti-B220 (RA3-6B2), anti-CCR6 (29-2L17), anti-CD1d (1B1), anti-CD3 (145-2C11), anti-CD4 (RM4-5), anti-CD5 (53-7.3), anti-CD8 $\alpha$  (53-6.7), anti-CD11b (M1/70), anti-CD11c (N418), anti-CD19 (6D5), anti-CD21 (7E9), anti-CD22.2 (Cy34.1), anti-CD23 (B3B4), anti-CD25 (PC61), anti-CD44 (IM7), anti-CD62L (MEL-14), anti-CD86 (GL-1), anti-CD93 (AA4.1), anti-CD138 (281-2), anti-CD317 (927), anti-NK1.1 (PK136), anti-CXCR5 (L138D7), anti-F4/80 (BM8), anti-IA<sup>b</sup> (AF6-120.1), anti-ICOS (C398.4A), anti-ICOSL (HK5.3), anti-BAFF-R (7H22-E16), anti-IgM (RMM-1), anti-IgM<sup>a</sup> (MA-69), anti-IgM<sup>b</sup> (AF6-78), anti-IgD (11-26c.2a), anti-Ig $\lambda$ 1 (R11-153), anti-TCR $\gamma\delta$  (UC7-13D5), anti-TCR $\beta$  (H57-597), which were purchased from BD Biosciences, eBioscience or BioLegend (San Diego, CA, USA). Antibodies used for intracellular staining were anti-Foxp3 (FJK-16s; eBioscience), anti-T-bet (4B10; eBioscience), anti-IL-6 (MP5-20F3; eBioscience), anti-IL-10 (JES5-16E3; eBioscience), anti-IL-17A (TC11-18H10.1; BioLegend), anti-IFN $\gamma$  (XMG1.2; BD Biosciences), anti-TNF $\alpha$  (MP6-XT22; BioLegend), anti-ROR $\gamma$ t (B2D; eBioscience), anti-Blk (Cell Signaling Technology, Danvers, MA) and FITC-donkey anti-rabbit IgG (Invitrogen, Grand Island, NY).

### ELISAs

Cytokine, IgM, IgG, and autoantibody levels in supernatants or sera were determined with ELISA kits purchased from eBioscience, BioLegend, R and D systems (Minneapolis, MN, USA), or Alpha Diagnostics (San Antonio, TX, USA).

### In vitro stimulation of immune cell subsets

To assess pDC function, pDCs from 2-month-old B6.*lpr* or Blk<sup>+/-</sup>.*lpr* spleens were purified by negative selection using the Mouse Plasmacytoid Dendritic Cell Isolation Kit II (Miltenyi, Auburn, CA, USA) and then stimulated with Type C CpG ODN 2395 (1  $\mu$ g/ml; Invivogen, San Diego, CA, USA) for 24 hours at 37°C. Supernatants were collected and assayed for IFN $\alpha$  by ELISA.

To polarize naïve CD4<sup>+</sup> T cells towards the Th17 and Tfh effector lineages, naïve CD4<sup>+</sup> T cells were purified from the spleens and peripheral lymph nodes (pLNs) of B6 mice by negative selection using magnetic bead separation as previously described [23]. Cells were stimulated with 5  $\mu$ g/ml of immobilized anti-CD3 antibody and 1  $\mu$ g/ml of soluble anti-CD28 antibody in the presence of 1 ng/ml anti-IFN $\gamma$  antibody, 1 ng/ml anti-IL-4 antibody, and either IL-6 (100 ng/ml; Miltenyi) for Tfh polarization or IL-6 (100 ng/ml) plus TGF $\beta$  (1 ng/ml; Miltenyi) for Th17 polarization. After 3 days at 37°C, cells were harvested and their Blk expression levels were analyzed by flow cytometry.

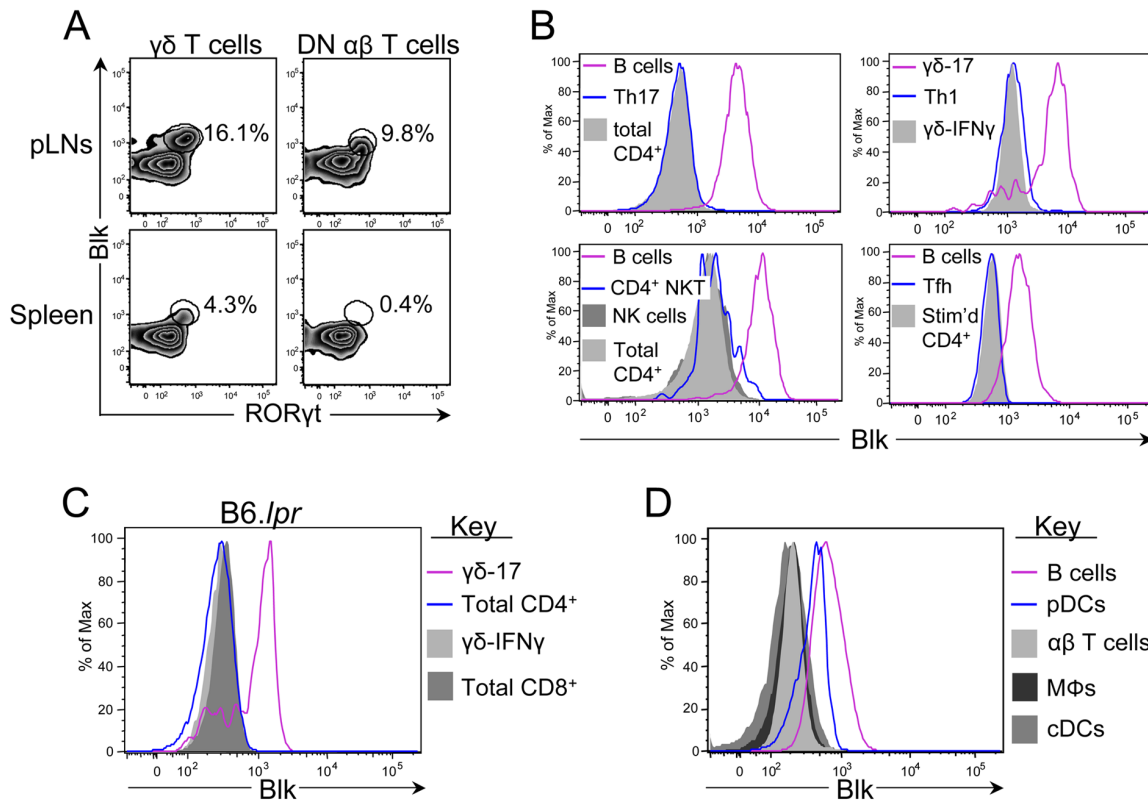

**Figure 1. Comparison of Blk expression levels in multiple immune cell subsets.** (A) Dot plots showing ROR $\gamma$ t versus Blk expression in gated  $\gamma\delta$  T cells (left) and DN  $\alpha\beta$  T cells (right) from the pLNs (top) and spleen (bottom) of B6 mice. (B) Histograms showing Blk expression levels in various effector cell subsets. Tfh and Th17 cells were obtained by culturing TCR-stimulated naive CD4<sup>+</sup> T cells under the respective polarizing conditions. The other effector subsets were identified by surface phenotype on *ex vivo* splenocytes or pLN cells from B6 mice. Specifically, they were NK cells (NK1.1<sup>+</sup> CD3<sup>-</sup> CD19<sup>-</sup>), CD4<sup>+</sup> NKT cells (CD4<sup>+</sup> NK1.1<sup>+</sup> TCR $\beta$ <sup>+</sup> CD3<sup>+</sup>), and Th1 cells (CD4<sup>+</sup> T-bet<sup>+</sup>). B cells (CD19<sup>+</sup>) and  $\gamma\delta$ -17 cells (CD27<sup>-</sup> CCR6<sup>+</sup>) are shown as positive controls. CD4<sup>+</sup> TCR $\beta$ <sup>+</sup> CD3<sup>+</sup> cells, both *ex vivo* and *in vitro* TCR-stimulated, and  $\gamma\delta$ -IFN $\gamma$  cells (CD27<sup>+</sup> CCR6<sup>-</sup>) are shown as negative controls, as previously described [23]. (C) Histograms showing Blk expression levels in CD4<sup>+</sup> TCR $\beta$ <sup>+</sup> CD3<sup>+</sup> and CD8<sup>+</sup> TCR $\beta$ <sup>+</sup> CD3<sup>+</sup> pLN cells from B6.lpr mice displaying lymphadenopathy.  $\gamma\delta$ -17 and  $\gamma\delta$ -IFN $\gamma$  cells from B6.lpr mice are shown as positive and negative controls, respectively. (D) Histograms showing Blk expression in B cells (CD19<sup>+</sup>; positive staining control), pDCs (CD19<sup>-</sup> CD317<sup>+</sup> CD11c<sup>+</sup>),  $\alpha\beta$  T cells (CD3<sup>+</sup>; negative staining control), macrophages (MΦs; CD19<sup>-</sup> CD11b<sup>+</sup>), and cDCs (CD19<sup>-</sup> CD317<sup>-</sup> CD11c<sup>+</sup>) from the spleens of B6 mice. For all experiments, 4 to 8 mice per genotype were used.

doi:10.1371/journal.pone.0092054.g001

For all other *in vitro* stimulation assays,  $3 \times 10^6$  pLN or spleen cells from 3-month-old B6, Blk<sup>+/-</sup>, B6.lpr, or Blk<sup>+/-</sup>.lpr mice were cultured for 4 hours at 37°C in the presence of brefeldin A-containing Leukocyte Activation Cocktail (BD Biosciences) to assess cytokine production by various immune cell subsets or in the presence of Cell Stimulation Cocktail (eBioscience) to measure cytokines in the supernatant.

#### Measurement of Urine Protein Concentration

Protein concentrations in the urine were monitored on a weekly basis using Albustix assay strips (Siemens Healthcare Diagnostics, Tarrytown, NY, USA). Scoring was as follows: 0 = 0 mg/dl; 1 = trace; 2 = 30 mg/dl; 3 = 100 mg/dl; 4 = 300 mg/dl; 5 = >300 mg/dl.

#### Histopathology

Kidneys, lungs, and livers were harvested, fixed in 10% neutral-buffered formalin, and then embedded in paraffin. For light microscopy, tissue samples were sectioned at 4  $\mu$ m and then stained with H&E or periodic acid-Schiff (PAS). For electron microscopy, specimens were chosen from paraffin-embedded kidneys, using H&E stained sections to locate glomeruli. Specimens were reprocessed as follows: dewaxing in xylene, rehydrating in progressively diluted ethanol, post-fixing in osmium tetroxide, dehydrating in progressively concentrated ethanol, infiltrating with propylene oxide, embedding in Epon, and then sectioning with an ultramicrotome. Glomerular damage was assessed by a renal pathologist (A.H.T.), who was blinded to the genotype of the kidney samples.

mens were reprocessed as follows: dewaxing in xylene, rehydrating in progressively diluted ethanol, post-fixing in osmium tetroxide, dehydrating in progressively concentrated ethanol, infiltrating with propylene oxide, embedding in Epon, and then sectioning with an ultramicrotome. Glomerular damage was assessed by a renal pathologist (A.H.T.), who was blinded to the genotype of the kidney samples.

#### Quantitative real-time RT-PCR analysis and RT<sup>2</sup> Profiler PCR array

RNA was isolated from homogenized kidneys and splenic B cells using Qiagen's RNeasy kit, and cDNA was synthesized using Invitrogen's SuperScript First-Strand Synthesis System. The expression of genes associated with the IL-23/IL-17 axis was assessed using Qiagen's "Th17 for Autoimmunity and Inflammation" RT<sup>2</sup> Profiler PCR array. For quantitative real-time PCR analysis, all primer sets, as well as the SYBR Green PCR Master Mix, were purchased from Qiagen (Valencia, CA, USA).

#### Listeria Infection

Infection of mice with *Listeria monocytogenes* and subsequent analysis of T cell effector function were performed as previously

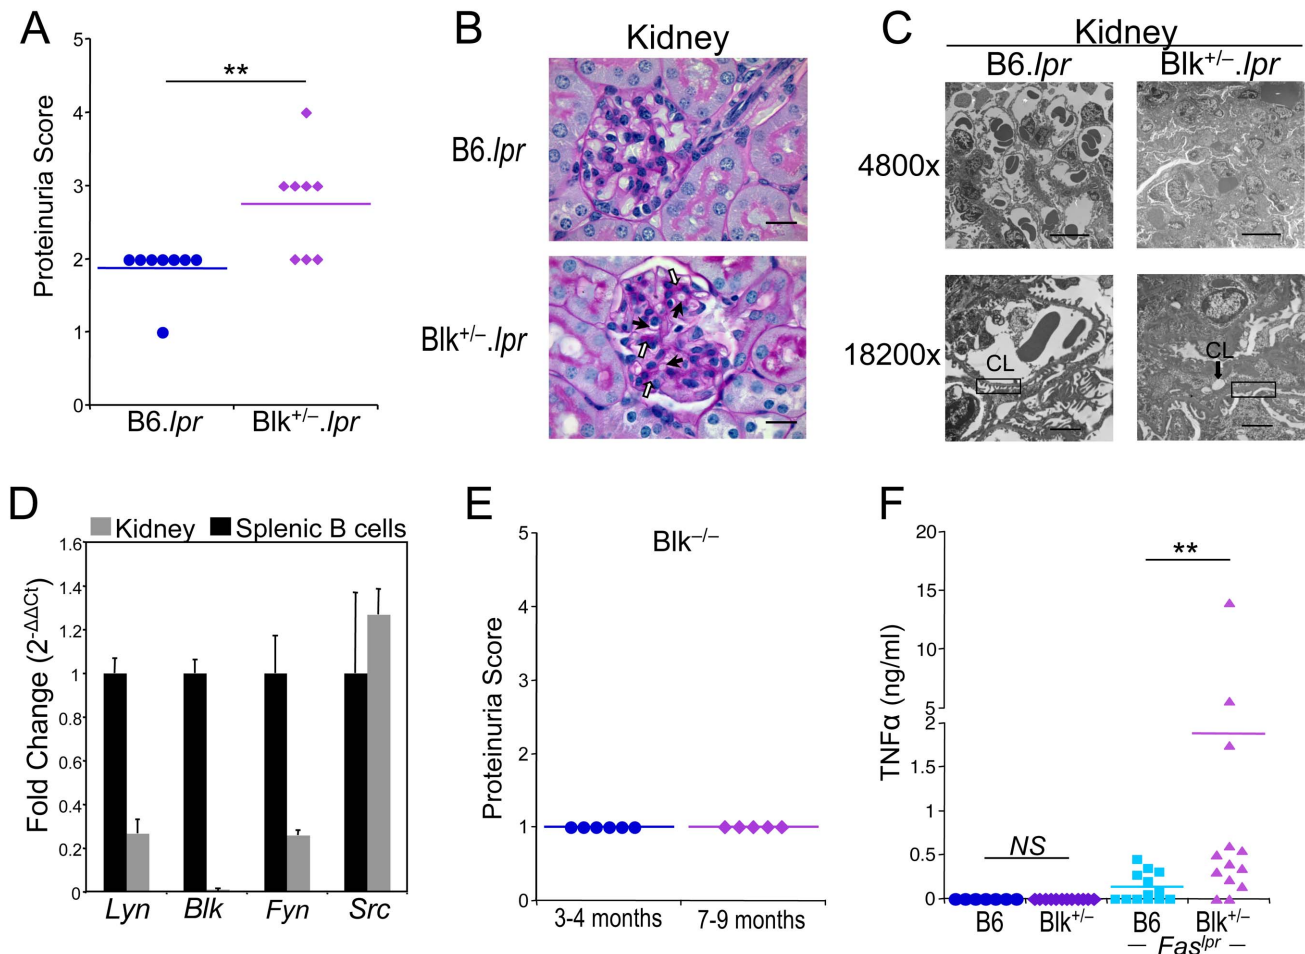

**Figure 2. 5-month-old  $Blk^{+/-} .lpr$  mice exhibit proteinuria and nephrosis.** (A) Comparison of proteinuria scores between 5-month-old  $B6.lpr$  and  $Blk^{+/-} .lpr$  mice. 0 = 0 mg/dl; 1 = trace; 2 = 30 mg/dl; 3 = 100 mg/dl; 4 = 300 mg/dl; 5 = >300 mg/dl. Each symbol represents an individual mouse. (B) Representative light micrographs of PAS stained kidney sections from 5-month-old  $B6.lpr$  ( $n=7$ ) and  $Blk^{+/-} .lpr$  ( $n=8$ ) mice at 1000 $\times$  magnification. Filled arrows highlight examples of narrowed capillary lumens, while open arrows highlight examples of PAS-positive hyaline deposits. Bar = 20  $\mu$ m. (C) Electron micrographs of glomeruli from 5-month-old  $B6.lpr$  and  $Blk^{+/-} .lpr$  mice. Line in bottom of micrographs represents 10  $\mu$ m in the 4800 $\times$  magnification and 2  $\mu$ m in the 18200 $\times$  magnification. CL, capillary lumen. Rectangular boxes highlight normal (left panel) and shortened/fused (right panel) podocyte foot processes. (D) Quantitative real-time RT-PCR analysis showing expression of *Src*, *Fyn*, *Lyn* but not *Blk* in B6 kidney. Data were normalized to *Gapdh* levels and are presented as fold change over purified splenic B cells (set to 1). Data represent 4 kidney samples and 4 B cell samples. (E) Proteinuria scores for 3- to 4-month-old and 7- to 9-month old  $Blk^{-/-}$  mice. Each symbol represents an individual mouse. (F) Comparison of serum TNF $\alpha$  levels between 5-month-old  $B6.lpr$  and  $Blk^{+/-} .lpr$  mice. Each symbol represents an individual mouse. 5/13 (38.5%) of  $B6.lpr$  mice and 11/13 (84.6%) of  $Blk^{+/-} .lpr$  mice have serum TNF $\alpha$  concentrations greater than 0.1 ng/ml.  $^{**}p \leq 0.01$ . doi:10.1371/journal.pone.0092054.g002

described [27], except that a cocktail of IL-23 (50 ng/ml; BioLegend), IL-1 (10 ng/ml; BioLegend), and Pam<sub>3</sub>Cys (1  $\mu$ g/ml; Invivogen) was used to elicit IL-17 production from both  $\gamma\delta$ -17 and DN-17 cells.

### Statistical analysis

Data are presented as either values for individual mice or the mean  $\pm$  SEM for a group of mice. All statistical analyses were performed using GraphPad Prism software (La Jolla, CA, USA). The Student's *t* test was used to analyze parametric data, the Mann-Whitney *U* test was used to analyze nonparametric data, and the Spearman's rank order correlation was used to measure the strength of the relationship between TNF $\alpha$  serum levels and urine protein concentrations and between IgG serum levels and cytokine serum levels.

## Results

### Blk is expressed in murine B cells, $\gamma\delta$ and DN $\alpha\beta$ T cells with the potential to produce IL-17, and pDCs

The first step in determining the contribution of *BLK* risk alleles to SLE development and pathogenesis is to identify which cells express this SFK. We have previously shown, using an intracellular flow cytometric assay that we developed to measure Blk expression levels, that Blk is expressed in T lineage cells, specifically immature DN thymocytes,  $\gamma\delta$  thymocytes and  $\gamma\delta$ -17 cells [23]. Here, we have extended these previous findings to include DN-17 cells (Figure 1A), which are defined by their expression of ROR $\gamma$ t, a transcription factor required for IL-17 expression [28]. Blk, however, is not a universal marker for IL-17-producing cells, as other cell types that produce IL-17, such as T helper 17 (Th17) cells, CD4<sup>+</sup> NKT cells and NK cells, did not express Blk (Figure 1B). Moreover, Blk was not detected in Th1

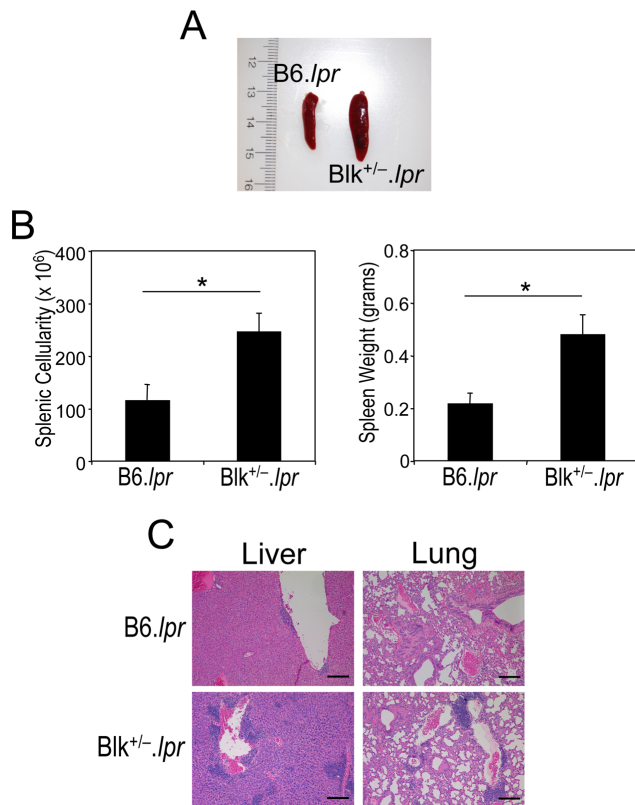

**Figure 3. 5-month-old  $Blk^{+/-}$ .lpr mice exhibit multiple autoimmune phenotypes.** (A) 5-month-old  $Blk^{+/-}$ .lpr mice exhibit splenomegaly. (B) Comparison of splenic cellularity and weight between 5 month-old B6.lpr ( $n=7$ ) and  $Blk^{+/-}$ .lpr ( $n=8$ ) mice. (C) Multifocal lymphocyte infiltrates are observed in the liver and lungs of 5-month-old  $Blk^{+/-}$ .lpr mice but not age-matched B6.lpr mice. 100 $\times$  magnification is shown. Bar = 200  $\mu$ m. \* $p \leq 0.05$ . doi:10.1371/journal.pone.0092054.g003

cells and T follicular helper (Tfh) cells (Figure 1B), both of which participate in SLE development and pathogenesis [29,30]. Last, we did not observe Blk expression in  $CD4^+$  and  $CD8^+$  T cells from B6.lpr mice (Figure 1C), indicating that neither the expression of the *Fas<sup>lpr</sup>* mutation in T cells nor the microenvironment induced by the expression of the *Fas<sup>lpr</sup>* mutation resulted in abnormal expression of Blk in conventional  $\alpha\beta$  T cells. These data indicate that Blk expression in mature T lineage cells is limited to unconventional IL-17-producing T cells.

Blk, along with other components of the BCR-coupled signaling pathway, are expressed by human pDCs [21]. Notably, we found that murine pDCs also express Blk, albeit at levels lower than those observed in B cells (Figure 1D). No Blk expression, however, was detected in murine macrophages and conventional dendritic cells (cDCs) (Figure 1D). These data demonstrate that Blk is expressed in B cells,  $\gamma\delta$ -17 cells, DN-17 cells, and pDCs. Although these are functionally disparate cells, it is important to note that all of these cell types play a role in autoimmune disease development and/or pathogenesis [31–34].

#### Development of proteinuria and nephrosis in 5-month-old $Blk^{+/-}$ .lpr mice

B6.lpr mice do not manifest severe autoimmune disease, specifically glomerulonephritis, until 9 months of age [35]. Consequently, we reasoned that if *BLK* were a *bona fide* susceptibility gene, then reducing its expression would either

accelerate the onset of glomerulonephritis or increase its incidence and severity in B6.lpr mice. To test this, we monitored the concentration of protein in the urine, as a measure of glomerular barrier function, starting at 3 months of age. At 5 months of age, 60% of the  $Blk^{+/-}$ .lpr mice, but none of the B6.lpr mice, displayed proteinuria (defined as  $\geq 100$  mg/dl) (Figure 2A). Surprisingly, by light microscopy, none of the  $Blk^{+/-}$ .lpr mice showed mesangial proliferation or any other signs of immune complex (IC)-induced inflammation (Figure 2B). In agreement with this, we found no difference in the serum levels of ANAs between 5-month-old B6.lpr and  $Blk^{+/-}$ .lpr mice (Figure S1A). We did note, however, narrowing of the capillary lumens and PAS-positive hyaline deposits in the glomeruli of  $Blk^{+/-}$ .lpr mice but not in those of B6.lpr mice (Figure 2B). To explain the development of proteinuria in the absence of IC-induced inflammation, we examined the ultrastructure of the  $Blk^{+/-}$ .lpr glomerulus by electron microscopy. In addition to the narrowed capillary lumens and hyaline deposition, we observed damage to the podocyte, a component of the glomerular filtration barrier, as evidenced by the considerable focal shortening (i.e., effacement) of their foot processes in the  $Blk^{+/-}$ .lpr glomerulus (Figure 2C, Figure S2). Taken together, these data indicate that 5-month-old  $Blk^{+/-}$ .lpr mice suffer from nephrosis, a kidney disease that is frequently observed in SLE patients with renal involvement [36,37]. In fact, a recent classification, termed lupus podocytopathy, has been developed to describe SLE patients who present with nephrotic-range proteinuria and podocyte foot process effacement but no IC-induced inflammation [36,38].

One possible explanation for the development of proteinuria in  $Blk^{+/-}$ .lpr mice is that Blk is expressed by resident kidney cells, and that reducing its expression leads to impaired glomerular barrier function. To test this, we used quantitative RT-PCR analysis to determine whether *Blk*, along with other SFK genes, are expressed in wild-type B6 kidney. Notably, we found that cells within the kidney expressed *Src*, *Lyn*, and *Fyn* transcripts but not *Blk* transcripts (Figure 2D), which is consistent with recent reports showing that neither the *Blk* gene nor the Blk protein is expressed in total kidney, kidney cell lines and primary podocytes [39,40]. Nonetheless, to rule out an intrinsic role for Blk in maintaining glomerular barrier function, we determined whether Blk-deficient mice develop proteinuria with age. As shown in Figure 2E, only trace amounts of protein are detected in the urine of 3- to 4-month-old as well as of 7- to 9-month-old  $Blk^{-/-}$  mice. Taken together, these data suggest that the development of proteinuria in 5-month-old  $Blk^{+/-}$ .lpr mice is through an extrinsic mechanism.

In both humans and mice, there is a strong correlation between serum levels of  $TNF\alpha$  and the severity of proteinuria [41,42]. Accordingly, another possible explanation for the development of proteinuria in  $Blk^{+/-}$ .lpr mice is that reducing Blk expression in B6.lpr mice promotes  $TNF\alpha$  production. To test this, we compared  $TNF\alpha$  serum levels in 5-month-old B6.lpr and  $Blk^{+/-}$ .lpr mice and found that they were indeed significantly higher in  $Blk^{+/-}$ .lpr mice than in B6.lpr mice (Figure 2F). Moreover,  $TNF\alpha$  levels correlated with severity of proteinuria ( $r^2 = 0.594$ ;  $p = 0.02$ ), suggesting that elevated  $TNF\alpha$  levels contribute to the development of proteinuria, and possibly nephrosis, in  $Blk^{+/-}$ .lpr mice.

Notably, other phenotypes that are associated with autoimmune disease were also observed in 5-month-old  $Blk^{+/-}$ .lpr mice. These included splenomegaly and multifocal lymphocytic infiltration of the lung and liver (Figure 3). Collectively, these data indicate that solely reducing Blk expression levels in B6.lpr mice leads to early onset lymphoproliferation, proteinuria and nephrosis.

**Table 1.** Comparison of immune cell numbers in 3-month-old B6, *Blk*<sup>+/-</sup>, *B6.lpr* and *Blk*<sup>+/-</sup>.*lpr* mice.

|                                                                             | B6                      | <i>Blk</i> <sup>+/-</sup> | <i>p</i> value | <i>B6.lpr</i> | <i>Blk</i> <sup>+/-</sup> . <i>lpr</i> | <i>p</i> value |
|-----------------------------------------------------------------------------|-------------------------|---------------------------|----------------|---------------|----------------------------------------|----------------|
| <b>Spleen</b>                                                               | 89.1 ± 4.0 <sup>a</sup> | 114.3 ± 6.8               | 0.002          | 124.7 ± 7.2   | 155.4 ± 9.2                            | 0.01           |
| Total B cells (CD19 <sup>+</sup> )                                          | 40.8 ± 2.3              | 49.3 ± 3.8                | 0.05           | 62 ± 3.1      | 70.7 ± 4.0                             | 0.1            |
| Transitional (CD93 <sup>+</sup> CD19 <sup>+</sup> )                         | 5.5 ± 0.5               | 6.1 ± 1.0                 | 0.6            | 14.3 ± 1.2    | 15.8 ± 1.6                             | 0.5            |
| FO B cells (CD93 <sup>-</sup> CD23 <sup>hi</sup> CD21 <sup>lo</sup> )       | 32 ± 2.1                | 36.5 ± 2.8                | 0.2            | 36.6 ± 2.2    | 43.2 ± 3.1                             | 0.1            |
| MZ B cells (CD93 <sup>-</sup> CD23 <sup>hi</sup> CD21 <sup>hi</sup> )       | 2.9 ± 0.3               | 2.4 ± 0.3                 | 0.2            | 4.0 ± 0.3     | 3.9 ± 0.4                              | 0.9            |
| Pre-plasmablasts (CD93 <sup>-</sup> CD23 <sup>hi</sup> CD21 <sup>lo</sup> ) | 1.7 ± 0.2               | 3.1 ± 0.4                 | 0.003          | 4.6 ± 0.3     | 5.9 ± 0.5                              | 0.03           |
| B1 B cells (CD5 <sup>+</sup> IgM <sup>+</sup> )                             | 0.7 ± 0.09              | 1.3 ± 0.1                 | 0.002          | 1.5 ± 0.1     | 1.8 ± .09                              | 0.1            |
| Total T cells (CD3 <sup>+</sup> )                                           | 33.1 ± 2.4              | 48.5 ± 3.4                | 0.0007         | 41.2 ± 5.5    | 58.0 ± 5.0                             | 0.03           |
| Total CD4 <sup>+</sup> cells                                                | 18.6 ± 1.5              | 26.8 ± 2.1                | 0.002          | 20.1 ± 2.4    | 27.8 ± 2.2                             | 0.02           |
| T <sub>reg</sub> cells (CD4 <sup>+</sup> Foxp3 <sup>+</sup> )               | 3.4 ± 0.3               | 3.8 ± 0.3                 | 0.4            | 5.8 ± 0.7     | 7.2 ± 0.5                              | 0.1            |
| Total CD8 <sup>+</sup> cells                                                | 12.8 ± 0.9              | 18.2 ± 1.1                | 0.0006         | 11.3 ± 1.9    | 13.9 ± 1.2                             | 0.2            |
| Total DN αβ T cells                                                         | 0.9 ± 0.07              | 1.5 ± 0.2                 | 0.0006         | 8.2 ± 1.3     | 14.1 ± 1.7                             | 0.02           |
| B220 <sup>+</sup> DN αβ T cells                                             | 0.2 ± 0.02              | 0.4 ± 0.06                | 0.01           | 6.4 ± 1.1     | 11.7 ± 1.6                             | 0.02           |
| γδ T cells                                                                  | 1.1 ± 0.08              | 1.9 ± 0.2                 | 0.0009         | 1.4 ± 0.2     | 1.9 ± 0.2                              | 0.07           |
| Macrophages (CD19 <sup>-</sup> F4/80 <sup>+</sup> )                         | 1.8 ± 0.2               | 2.5 ± 0.3                 | 0.05           | 5.1 ± 0.6     | 5.3 ± 0.5                              | 0.8            |
| cDCs (CD19 <sup>-</sup> CD11c <sup>+</sup> CD317 <sup>-</sup> )             | 0.8 ± 0.07              | 1.2 ± 0.1                 | 0.08           | 1.7 ± 0.1     | 1.8 ± 0.1                              | 0.6            |
| pDCs (CD19 <sup>-</sup> CD11c <sup>+</sup> CD317 <sup>+</sup> )             | 0.13 ± 0.01             | 0.22 ± 0.04               | 0.06           | 0.18 ± 0.01   | 0.24 ± 0.02                            | 0.03           |
| <b>Peritoneal Cavity</b>                                                    | 1.4 ± 0.2               | 2.3 ± 0.5                 | 0.08           | 3.6 ± 0.4     | 3.0 ± 0.4                              | 0.3            |
| B1 B cells (CD5 <sup>+</sup> IgM <sup>+</sup> )                             | 0.019 ± 0.005           | 0.023 ± 0.006             | 0.5            | 0.3 ± 0.007   | 0.4 ± 0.006                            | 0.7            |
| <b>Lymph Nodes</b>                                                          | 26.4 ± 1.1              | 29.5 ± 1.5                | 0.1            | 54.0 ± 7.9    | 66.1 ± 9.3                             | 0.3            |
| Total T cells (CD3 <sup>+</sup> )                                           | 18.8 ± 1.1              | 22.2 ± 1.4                | 0.06           | 33.2 ± 5.7    | 40.1 ± 6.3                             | 0.4            |
| Total CD4 <sup>+</sup> cells                                                | 9.5 ± 0.6               | 11.2 ± 0.7                | 0.09           | 9.3 ± 1.3     | 11.7 ± 1.8                             | 0.3            |
| Total CD8 <sup>+</sup> cells                                                | 8.7 ± 0.5               | 10.1 ± 0.6                | 0.06           | 10.4 ± 1.4    | 12.8 ± 2.2                             | 0.4            |
| Total DN αβ T cells                                                         | 0.2 ± 0.02              | 0.3 ± 0.05                | 0.06           | 12.0 ± 3.3    | 14.0 ± 3.1                             | 0.7            |
| B220 <sup>+</sup> DN αβ T cells                                             | 0.04 ± 0.009            | 0.06 ± 0.01               | 0.2            | 10.7 ± 3.0    | 12.4 ± 2.9                             | 0.7            |
| γδ T cells                                                                  | 0.3 ± 0.02              | 0.4 ± 0.03                | 0.006          | 0.8 ± 0.1     | 1.3 ± 0.3                              | 0.09           |

<sup>a</sup>Mean number of cells per tissue or subset ± SEM × 10<sup>6</sup>. n = 10 to 27 mice per genotype.  
doi:10.1371/journal.pone.0092054.t001

To gain insight into the mechanisms by which *Blk* expression levels regulate autoimmune disease development, we performed a phenotypic and functional analysis of *Blk*<sup>+/-</sup>.*lpr* mice, prior to the onset of proteinuria and nephrosis, in order to exclude any disease-related effects on immune cell function. We settled on 3 months of age because, at this age, *Blk*<sup>+/-</sup>.*lpr* mice exhibit lymphoproliferation but have minimal levels of serum autoantibodies and no serum TNFα nor proteinuria (Table 1, Figure S1B and C, data not shown).

### *Blk* is required to regulate B cell functional responses not B cell tolerance

We have previously shown that MZ B cell numbers are significantly decreased in 2-month-old *Blk*<sup>+/-</sup> mice but, with age, MZ B cell numbers increase and, at 6 months of age, even surpass those observed in age-matched B6 mice [17]. At 3 months of age, in both *Blk*<sup>+/-</sup> and *Blk*<sup>+/-</sup>.*lpr* mice, we found that MZ B cell numbers were equivalent to those in B6 and *B6.lpr* mice, respectively, although percentages of MZ B cells were significantly reduced in comparison to B6 and *B6.lpr* mice (Table 1, Figure S3). Except for an increase in the number of splenic B1 B cells in *Blk*<sup>+/-</sup> mice compared to B6 mice, no differences in the numbers of mature B cell subsets were observed between B6 and *Blk*<sup>+/-</sup> mice and between *B6.lpr* and *Blk*<sup>+/-</sup>.*lpr* mice at 3 months of age (Table 1).

One way B cells contribute to autoimmunity is through the production of autoantibodies [31]. We found that the serum levels of ANAs and anti-cardiolipin antibodies in 3-month-old *B6.lpr* and *Blk*<sup>+/-</sup>.*lpr* mice were low and were comparable to those in age-matched B6 and *Blk*<sup>+/-</sup> mice (Figure S1C, data not shown). Nonetheless, we did observe significant increases in the numbers of plasma (CD138<sup>+</sup>) cells, both short-lived (B220<sup>+</sup>) and long-lived (B220<sup>-</sup>), and in the total serum levels of IgM and IgG in *Blk*<sup>+/-</sup>.*lpr* mice compared to *B6.lpr* mice (Figure 4A-C). Notably, we also observed more long-lived plasma cells and higher IgM serum levels in *Blk*<sup>+/-</sup> mice than in B6 mice (Figure 4B-C). Together, these results suggested that reducing *Blk* expression leads to generalized B cell hyperactivity and not to a loss of B cell tolerance. To investigate this further, we generated and analyzed *Blk*<sup>+/-</sup> mice carrying the well-described 3H9 IgH transgene, which forms an anti-DNA antibody when paired with most endogenous light chains [26]. Phenotypic analysis of 6-month-old *Blk*<sup>+/+</sup> 3H9 Tg and *Blk*<sup>+/-</sup> 3H9 Tg mice revealed no differences in the percentage and number of anti-DNA (Igλ1<sup>+</sup> IgM<sup>at</sup>) B cells, and that the vast majority of anti-DNA B cells in both genotypes had similar surface phenotypes and were arrested at the transitional (CD93<sup>+</sup>) B cell stage (Figure 5A-D). More importantly, equivalent levels of anti-dsDNA IgG were detected in the sera of 6-month-old *Blk*<sup>+/-</sup> 3H9 Tg and *Blk*<sup>+/+</sup> 3H9 Tg mice (Figure 5E).

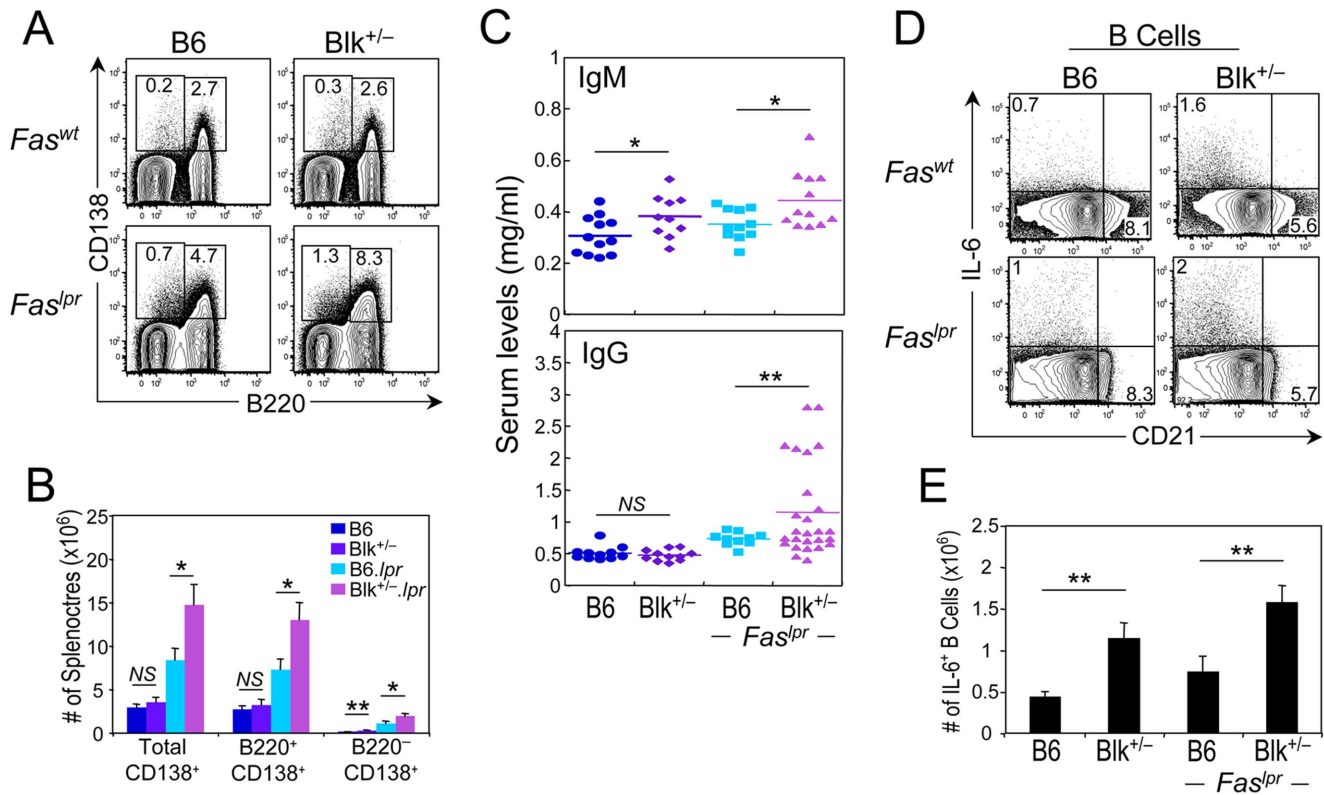

**Figure 4. Reducing Blk expression in B6.lpr mice results in B cell hyperactivity.** (A) Representative dot plots showing B220 versus CD138 expression on splenocytes from 3-month-old B6, Blk<sup>+/-</sup>, B6.lpr and Blk<sup>+/-</sup>.lpr mice. Percentages of cells that are short-lived (B220<sup>+</sup> CD138<sup>+</sup>) and long-lived (B220<sup>-</sup> CD138<sup>+</sup>) plasma cells are shown for each genotype. (B) Graph comparing number of total plasma cells, short-lived plasma cells, and long-lived plasma cells in B6 (n = 10), Blk<sup>+/-</sup> (n = 10), B6.lpr (n = 22) and Blk<sup>+/-</sup>.lpr (n = 22) mice. (C) Comparison of the total serum levels of IgM (top) and IgG (bottom) in 3-month-old B6, Blk<sup>+/-</sup>, B6.lpr and Blk<sup>+/-</sup>.lpr mice. Each symbol represents an individual mouse. (D) Splenocytes from 3-month-old B6, Blk<sup>+/-</sup>, B6.lpr and Blk<sup>+/-</sup>.lpr mice were stimulated with Leukocyte Activation Cocktail for 4 hours. Dot plots showing CD21 versus IL-6 expression in gated CD19<sup>+</sup> cells. Percentages of IL-6<sup>+</sup> splenic B cells are shown. (E) Graph comparing numbers of IL-6<sup>+</sup> splenic B cells in B6 (n = 4), Blk<sup>+/-</sup> (n = 4), B6.lpr (n = 7) and Blk<sup>+/-</sup>.lpr (n = 8) mice. \*p ≤ 0.05; \*\*p ≤ 0.01. doi:10.1371/journal.pone.0092054.g004

These data indicate that Blk does not act intrinsically to regulate B cell tolerance.

In addition to autoantibody production, B cells contribute to autoimmunity by secreting effector cytokines and functioning as antigen presenting cells (APCs) [31,43-45]. Accordingly, we assessed the ability of B cells from 3-month-old B6, Blk<sup>+/-</sup>, B6.lpr, and Blk<sup>+/-</sup>.lpr mice to secrete proinflammatory and anti-inflammatory cytokines and to express surface antigens associated with APC function. Following a short-term PMA/ionomycin-stimulation, we found that B cells from all four genotypes produced IL-6, IFN $\gamma$ , and IL-10, but not TNF $\alpha$  (Figure 4D, data not shown). When we quantified the number of cytokine-producing B cells, we noted ~2-fold more IL-6<sup>+</sup> B cells in Blk<sup>+/-</sup>.lpr mice than in B6.lpr mice (Figure 4D and E). Importantly, this same difference in IL-6<sup>+</sup> B cell numbers was also noted in Blk<sup>+/-</sup> mice in relation to B6 mice (Figure 4D and E). However, no differences in the numbers of IFN $\gamma$ <sup>+</sup> and IL-10<sup>+</sup> B cells were observed among B6, Blk<sup>+/-</sup>, B6.lpr, and Blk<sup>+/-</sup>.lpr mice (data not shown). Interestingly, the IL-6<sup>+</sup> B cells in all four genotypes were CD21<sup>lo/-</sup> (Figure 4D), which is the same phenotype as the B cells that are the major source of IL-6 in mice with experimental autoimmune encephalomyelitis [45].

Regarding the ability of B cell subsets to function as APCs, we found that CD86 and IA<sup>b</sup> surface levels were equivalent between B6.lpr and Blk<sup>+/-</sup>.lpr B cells (data not shown), but ICOSL surface

levels on follicular (FO) B cells from Blk<sup>+/-</sup>.lpr mice were reduced compared to those on FO B cells from B6.lpr mice (Figure 6A). This phenomenon cannot be explained by an increase in the size of Blk<sup>+/-</sup>.lpr FO B cells, as their cell size was comparable to those of B6 and B6.lpr FO B cells (Figure 6B). Since BAFF-R signaling regulates ICOSL expression on B cells [46,47], we next determined whether a decrease in BAFF serum levels, BAFF-R expression levels, or both can explain the lower ICOSL expression on Blk<sup>+/-</sup>.lpr FO B cells. Notably, while BAFF serum levels were higher, BAFF-R expression levels on B cells were lower, in both *Fas*<sup>lpr</sup> genotypes compared to both *Fas*<sup>wt</sup> genotypes (Figure 6C and D). Nonetheless, as no difference was observed between B6.lpr and Blk<sup>+/-</sup>.lpr mice in either their BAFF serum levels or their BAFF-R expression levels, it is unlikely that reduced BAFF-R signaling accounts for the lower ICOSL expression on Blk<sup>+/-</sup>.lpr FO B cells. It is possible, however, that the reduced ICOSL expression is a consequence of prior contact with ICOS<sup>+</sup> T cells, as ICOSL expression on B cells is downregulated following engagement with ICOS on T cells [46,48,49]. To test this, we examined splenic T cell subsets for the expression of ICOS, a costimulatory molecule that is only expressed on activated T cells [50]. ICOS surface levels were higher on all T cell subsets from B6.lpr and Blk<sup>+/-</sup>.lpr mice than on those from B6 and Blk<sup>+/-</sup> mice; however, the CD4<sup>+</sup> and CD8<sup>+</sup> T cell subsets from Blk<sup>+/-</sup>.lpr mice expressed significantly higher levels of ICOS than their B6.lpr counterparts

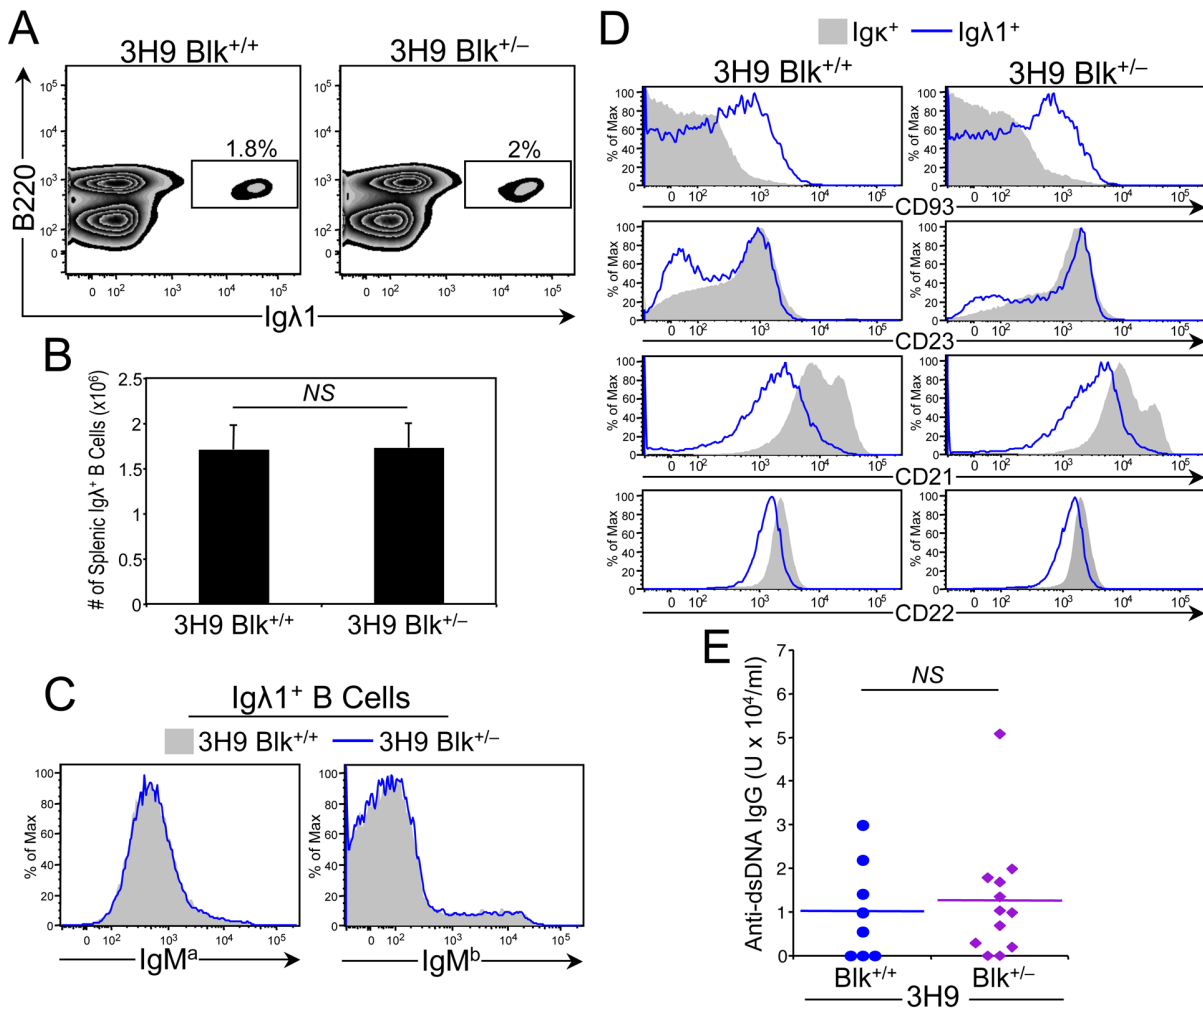

**Figure 5. Effect of reducing Blk expression on B cell tolerance induction in 3H9 Tg mice.** (A) Representative dot plots showing Ig $\lambda$ 1 versus B220 expression on total splenocytes from 6-month-old 3H9 Tg Blk<sup>+/+</sup> and 3H9 Tg Blk<sup>+/-</sup> mice. Numbers in plots represent percentage of anti-DNA B cells (B220<sup>+</sup> Ig $\lambda$ 1<sup>+</sup>). (B) Graph comparing absolute numbers of anti-DNA B cells in the spleens of 6-month-old 3H9 Tg Blk<sup>+/+</sup> (n = 7) and 3H9 Tg Blk<sup>+/-</sup> (n = 8) mice. (C) Histograms comparing IgM<sup>a</sup> (allotype of 3H9 IgH transgene) and IgM<sup>b</sup> (allotype of endogenous IgH) surface levels on gated Ig $\lambda$ 1<sup>+</sup> B cells from 6-month-old 3H9 Tg Blk<sup>+/+</sup> (n = 7) and 3H9 Tg Blk<sup>+/-</sup> (n = 8) mice. (D) Histograms comparing CD93, CD23, CD21 and CD22 levels on gated Ig $\kappa$ <sup>+</sup> (contains B cells that do not bind DNA) and Ig $\lambda$ 1<sup>+</sup> B cells from 6-month-old 3H9 Tg Blk<sup>+/+</sup> (n = 7) and 3H9 Tg Blk<sup>+/-</sup> (n = 8) mice. (E) Comparison of anti-dsDNA IgG antibodies in 6-month-old 3H9 Tg Blk<sup>+/+</sup> and 3H9 Tg Blk<sup>+/-</sup> mice. Each symbol represents an individual mouse. doi:10.1371/journal.pone.0092054.g005

(Figure 6E). These data suggest that the reduced ICOSL expression on Blk<sup>+/-</sup>.*lpr* FO B cells is due to augmented ICOS-ICOSL interactions in Blk<sup>+/-</sup>.*lpr* mice. Thus, B cells in 3-month-old Blk<sup>+/-</sup>.*lpr* mice have the capacity to play an autoantibody-independent role in the early stages of disease development, as evidenced by their enhanced ability to secrete IL-6 and to function as APCs.

### Blk is required to regulate T cell-mediated proinflammatory cytokine production

In light of the hyperactive B cell phenotype in 3-month-old Blk<sup>+/-</sup>.*lpr* mice, it was important to assess its effect on T cell numbers, phenotype and function. Interestingly, total T cell numbers were significantly higher in the Blk<sup>+/-</sup>.*lpr* spleen than in the B6.*lpr* spleen, with increased numbers of CD4<sup>+</sup> and DN  $\alpha\beta$  T cells accounting for the higher T cell numbers (Table 1, Figure S4A and B). We also noted increased numbers of CD4<sup>+</sup>, CD8<sup>+</sup>, DN  $\alpha\beta$ , and  $\gamma\delta$  T cells in the Blk<sup>+/-</sup> spleen relative to the B6

spleen (Table 1). However, despite the increase in total splenic T cell numbers in Blk<sup>+/-</sup>.*lpr* mice, the relative percentages of CD69<sup>+</sup> cells within the  $\alpha\beta$  and  $\gamma\delta$  T cell subsets, as well as the relative percentages of CD4<sup>+</sup> T cells with a memory cell phenotype (CD62L<sup>lo</sup>CD44<sup>hi</sup>), were comparable between the two *Fas*<sup>*lpr*</sup> genotypes (Figure S4C and D). Last, there was no difference in regulatory T cell numbers between B6 and Blk<sup>+/-</sup> mice and between B6.*lpr* and Blk<sup>+/-</sup>.*lpr* mice (Table 1, Figure S4A).

Given that ICOS-ICOSL interactions appear to be augmented in Blk<sup>+/-</sup>.*lpr* mice and that ICOS-ICOSL signaling is associated with Th1, Tfh and Th17 effector fates [51-54], we next enumerated effector subsets and/or cytokine-producing cells in B6.*lpr* and Blk<sup>+/-</sup>.*lpr* mice. Significant increases in the numbers of Tfh cells as well as in the numbers of IFN $\gamma$ -producing effector subsets were observed in Blk<sup>+/-</sup>.*lpr* mice relative to B6.*lpr* mice (Figure 7A, D, E). Furthermore, using both IL-17 production and phenotype (ROR $\gamma$ t<sup>+</sup>CCR6<sup>+</sup>) to identify  $\gamma\delta$ -17 cells, we detected significantly more  $\gamma\delta$ -17 cells in Blk<sup>+/-</sup>.*lpr* mice than in B6.*lpr* mice (Figure 7B, C, F). The numbers of IL-17<sup>+</sup>CD4<sup>+</sup> and DN  $\alpha\beta$



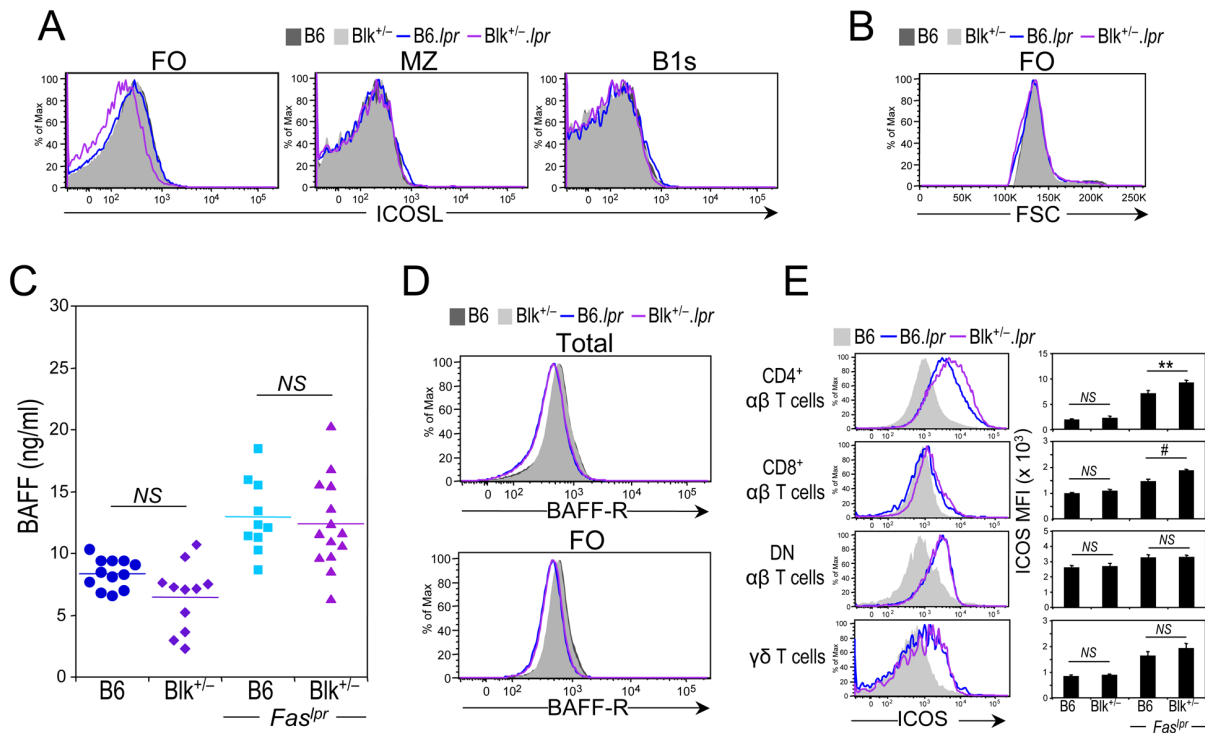

**Figure 6. Evidence for augmented ICOS-ICOSL interactions in *Blk*<sup>+/-</sup>.*lpr* mice.** (A) Representative histograms showing ICOSL levels on follicular (FO), marginal zone (MZ) and splenic B1 (B1s) B cells from 3-month-old B6 (n = 6), *Blk*<sup>+/-</sup> (n = 6), *B6.lpr* (n = 7) and *Blk*<sup>+/-</sup>.*lpr* (n = 8) mice. (B) Histogram comparing B cell size, using FSC units, among 3-month-old B6 (n = 6), *Blk*<sup>+/-</sup> (n = 6), *B6.lpr* (n = 7) and *Blk*<sup>+/-</sup>.*lpr* (n = 8) mice. (C) Comparison of the BAFF serum levels in 3-month-old B6, *Blk*<sup>+/-</sup>, *B6.lpr* and *Blk*<sup>+/-</sup>.*lpr* mice. Each symbol represents an individual mouse. (D) Representative histograms comparing BAFF-R levels on total (CD19<sup>+</sup>) (top) and FO B cells (bottom) from 3-month-old B6 (n = 8), *Blk*<sup>+/-</sup> (n = 10), *B6.lpr* (n = 13) and *Blk*<sup>+/-</sup>.*lpr* (n = 12) mice. (E) Representative histograms showing the expression of ICOS on CD4<sup>+</sup>, CD8<sup>+</sup>, DN αβ, and γδ T cells subsets from the spleens of 3-month-old *B6.lpr* and *Blk*<sup>+/-</sup>.*lpr* mice. ICOS levels on the corresponding T cell subsets from age-matched B6 mice are also shown (shaded histogram). Adjacent graph compares ICOS levels (MFI) on each T cell subset between 3-month-old B6 (n = 6) and *Blk*<sup>+/-</sup> (n = 6) mice and between 3-month-old *B6.lpr* (n = 7) and *Blk*<sup>+/-</sup>.*lpr* (n = 8) mice. doi:10.1371/journal.pone.0092054.g006

T cells, on the other hand, were equivalent between the two *Fas*<sup>*lpr*</sup> genotypes (Figure 7B, C, F). Lastly, consistent with increased local production of these proinflammatory cytokines, we found that the serum levels of IFNγ, IL-17A and IL-21 were significantly higher in *Blk*<sup>+/-</sup>.*lpr* mice than in *B6.lpr* mice (Figure 8). Together, these data demonstrate that reducing *Blk* expression in *B6.lpr* mice enhances proinflammatory cytokine production by both *Blk*-positive and -negative T cells.

We have previously shown that *Blk*-deficiency results in a selective loss of γδ-17 cells [23]. For this reason, we were intrigued to find that there were 50% more γδ-17 cells in *Blk*<sup>+/-</sup> mice than in B6 mice (Figures 7F and 9A). As this number is quite different than the predicted one, based on a gene dose effect, of 50% fewer γδ-17 cells than B6 mice, we conclude that *Blk*-haploinsufficiency and *Blk*-deficiency differentially affect the development and/or homeostasis of γδ-17 cells. To determine whether *Blk*-haploinsufficiency and *Blk*-deficiency also have different effects on γδ-17 cell function, we compared the *in vivo* γδ-17 response in B6, *Blk*<sup>+/-</sup> and *Blk*<sup>-/-</sup> mice following infection with *Listeria monocytogenes*, a model pathogen known to elicit a robust γδ-17 response [55]. On day 5 post infection, we found that the percentage of IL-17<sup>+</sup> γδ T cells is significantly higher in infected *Blk*<sup>+/-</sup> mice than in infected B6 mice, while virtually no IL-17<sup>+</sup> γδ T cells are detected in infected *Blk*<sup>-/-</sup> mice (Figure 9B). Taken together, these data demonstrate that *Blk*-deficiency and *Blk*-haploinsufficiency have opposing effects on the generation and differentiation of γδ-17 cells.

### *Blk* is required to regulate macrophage-mediated IL-6 production

Notably, macrophages, in addition to B cells, produced elevated amounts of IL-6 in *Blk*<sup>+/-</sup> and *Blk*<sup>+/-</sup>.*lpr* mice. Specifically, we observed a 3-fold increase in the number of IL-6<sup>+</sup> macrophages in *Blk*<sup>+/-</sup> mice compared to B6 mice and in *Blk*<sup>+/-</sup>.*lpr* mice compared to *B6.lpr* mice (Figure 10A). By contrast, nominal IL-6 production was detected in cDCs from all four genotypes (data not shown). Moreover, when we assayed for other proinflammatory cytokines, such as IL-1β, IL-12, IL-18, and IL-23, in the sera and the supernatants of short-term PMA/ionomycin-stimulated splenocytes from *B6.lpr* and *Blk*<sup>+/-</sup>.*lpr* mice, we were only able to detect IL-18, and it was produced in equivalent quantities in both *Fas*<sup>*lpr*</sup> genotypes (data not shown). These results demonstrate that reducing *Blk* expression in *B6.lpr* mice increases IL-6 production from macrophages, an immune cell that does not express *Blk*.

### *Blk* regulates pDC-mediated IFNα production

pDCs play an important role in autoimmunity through their production of type I interferon [32]. To determine whether their function is altered in *Blk*<sup>+/-</sup>.*lpr* mice, we measured serum levels of IFNα in *B6.lpr* and *Blk*<sup>+/-</sup>.*lpr* mice. Surprisingly, we observed significantly less IFNα in the sera of *Blk*<sup>+/-</sup>.*lpr* mice than in the sera of *B6.lpr* mice (Figure 10B). The decrease in serum IFNα levels is not the result of a defect in pDC development, as increased numbers of pDCs were detected in *Blk*<sup>+/-</sup>.*lpr* mice

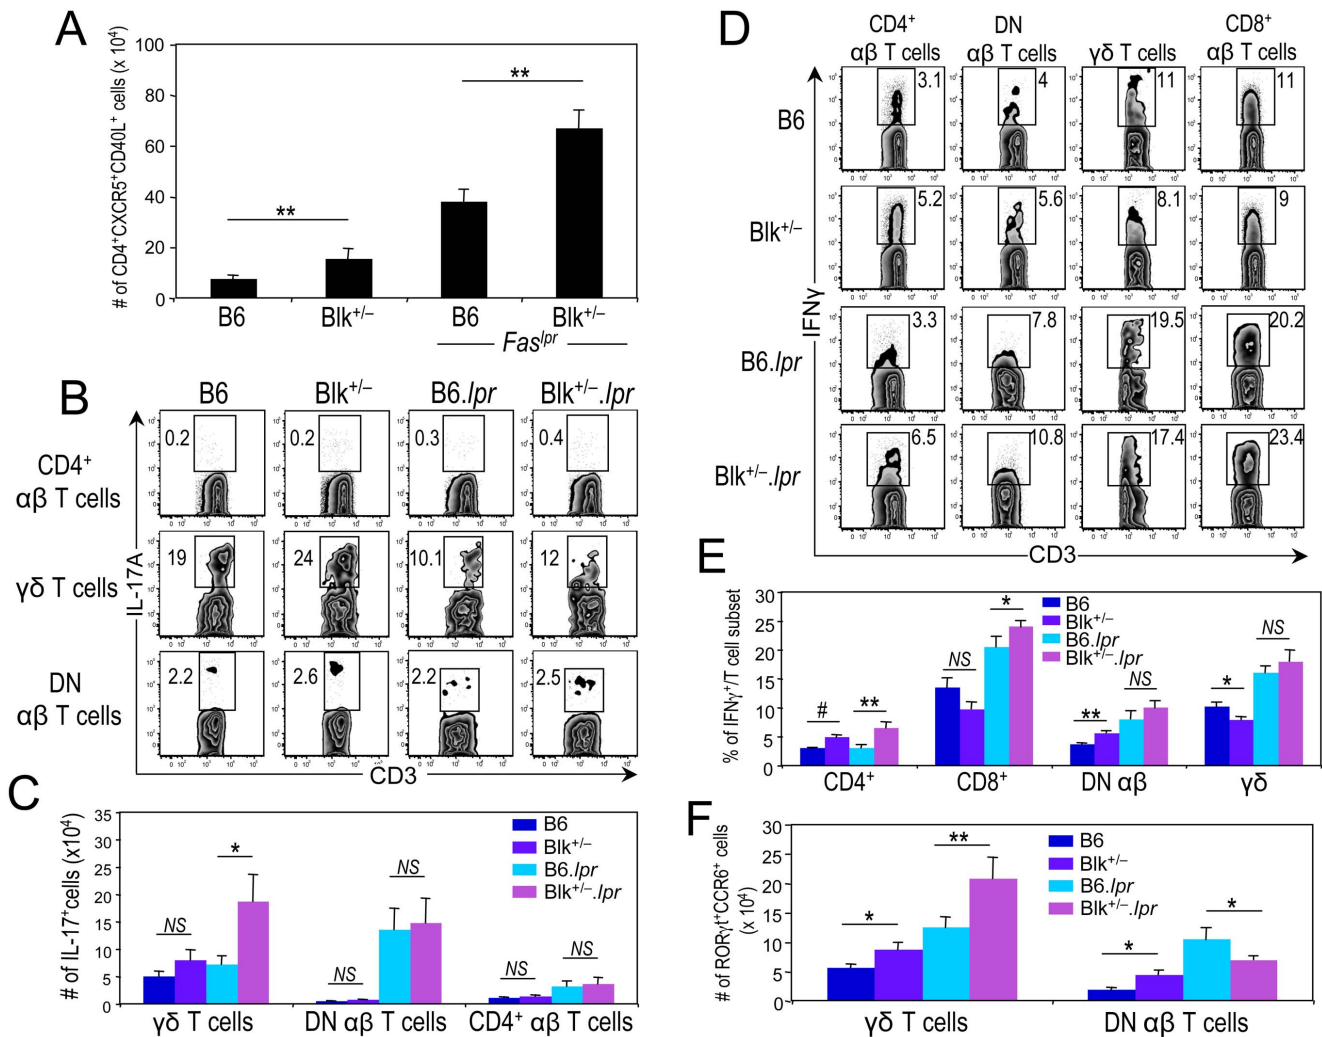

**Figure 7. Reducing Blk expression in B6.lpr mice increases numbers of IFN $\gamma$ -, IL-17A-, and IL-21-producing T cells.** (A) Graph comparing the number of splenic Tfh cells, defined as CD4<sup>+</sup> CXCR5<sup>+</sup> CD40L<sup>+</sup> cells, between 3-month-old B6 (n=6) and Blk<sup>+/-</sup> (n=6) mice and between 3-month-old B6.lpr (n=7) and Blk<sup>+/-</sup>.lpr (n=8) mice. (B) pLN cells from 3-month-old B6, Blk<sup>+/-</sup>, B6.lpr and Blk<sup>+/-</sup>.lpr were stimulated with Leukocyte Activation Cocktail for 4 hours. Representative dot plots showing CD3 versus IL-17A expression in CD4<sup>+</sup> αβ T cells (top), γδ T cells (middle) and in DN αβ T cells (bottom) from B6, Blk<sup>+/-</sup>, B6.lpr and Blk<sup>+/-</sup>.lpr mice. Numbers represent percentages of IL-17A<sup>+</sup> cells. (C) Graph summarizing data in (B). Comparison of the number of IL-17A<sup>+</sup> cells per T cell subset between 3-month-old B6 (n≥4) and Blk<sup>+/-</sup> (n≥5) mice and between 3-month-old B6.lpr (n≥7) and Blk<sup>+/-</sup>.lpr (n≥8) mice. (D) Splenocytes from 3-month-old B6, Blk<sup>+/-</sup>, B6.lpr and Blk<sup>+/-</sup>.lpr mice were stimulated with Leukocyte Activation Cocktail for 4 hours. Representative dot plots show CD3 versus IFN $\gamma$  expression in gated CD4<sup>+</sup>, CD8<sup>+</sup>, DN αβ and γδ T cell subsets. Numbers represent percentages of IFN $\gamma$ <sup>+</sup> cells. (E) Graph summarizing data in (D). Comparison of the percentage of IFN $\gamma$ <sup>+</sup> cells per T cell subset between 3-month-old B6 (n=4) and Blk<sup>+/-</sup> (n=4) mice and between 3-month-old B6.lpr (n=5) and Blk<sup>+/-</sup>.lpr (n=5) mice. (F) Graph comparing the numbers of ROR $\gamma$ t<sup>+</sup> CCR6<sup>+</sup> γδ T cells (γδ-17 cells) and DN αβ T cells (DN-17 cells) between the pLNs of 3-month-old B6 (n=8) and Blk<sup>+/-</sup> (n=7) mice and between the pLNs of 3-month-old B6.lpr (n=8) and Blk<sup>+/-</sup>.lpr (n=12) mice. \*p ≤ 0.05; \*\*p ≤ 0.01; #p ≤ 0.001. doi:10.1371/journal.pone.0092054.g007

compared to B6.lpr mice (Table 1). However, the decrease in serum IFN $\alpha$  levels may be due to TLR tolerance, as a result of chronic TLR stimulation [56], since purified pDCs from younger Blk<sup>+/-</sup>.lpr mice were able to secrete IFN $\alpha$ , and at higher levels than pDCs from age-matched B6.lpr mice, following *in vitro* CpG stimulation (Figure 10C). Alternatively, the decreased serum levels of IFN $\alpha$  may be due to high local production of TNF $\alpha$ , which is known to inhibit IFN $\alpha$  production from pDCs [57]. Although there were equivalent percentages of TNF $\alpha$ -producing T cells, DCs and macrophages following short-term PMA/ionomycin stimulation (Figure 10D), considerably more TNF $\alpha$ <sup>+</sup> splenic T cells are present in Blk<sup>+/-</sup>.lpr mice than in B6.lpr mice, as a result of there being 40% more T cells in the Blk<sup>+/-</sup>.lpr spleen than in the

B6.lpr spleen (Table 1). Collectively, these data suggest that the proinflammatory microenvironment established in the lymphoid tissue of Blk<sup>+/-</sup>.lpr mice negatively regulates IFN $\alpha$  secretion by pDCs.

### Blk is required to regulate proinflammatory cytokine production in the kidney

Because cytokines in the IL-23/IL-17 axis are critical in the pathogenesis of glomerulonephritis [35,58], it is unclear why Blk<sup>+/-</sup>.lpr mice, which have elevated numbers of IL-17-producing T cells, do not develop this type of kidney disease. To address this, we compared the gene expression profiles of 3-month-old, pre-nephrotic B6.lpr and Blk<sup>+/-</sup>.lpr kidneys using the “Th17 for Autoimmunity and

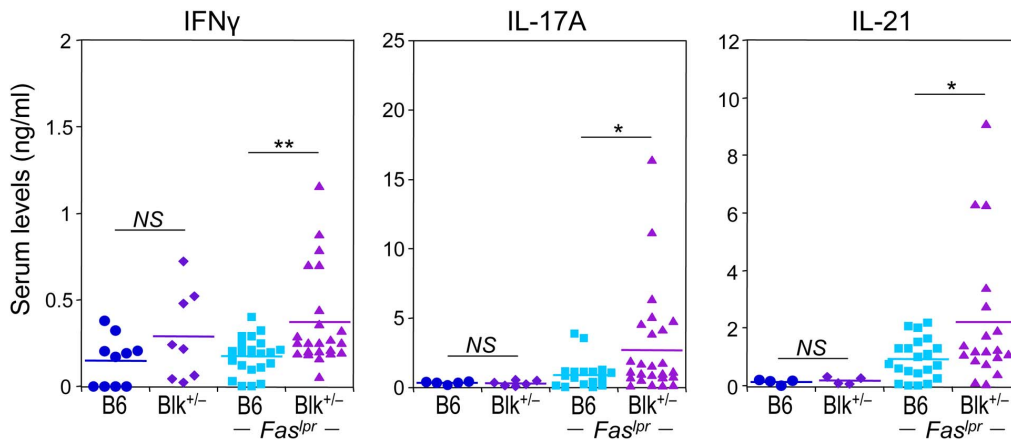

**Figure 8. Reducing Blk expression in B6.lpr mice increases serum levels of IFN $\gamma$ , IL-17A, and IL-21.** Comparison of serum IFN $\gamma$ , IL-17A, and IL-21 levels between 3-month-old B6 and Blk<sup>+/−</sup> mice and between 3-month-old B6.lpr and Blk<sup>+/−</sup>.lpr mice. Each symbol represents an individual mouse. \* $p \leq 0.05$ ; \*\* $p \leq 0.01$ . doi:10.1371/journal.pone.0092054.g008

Inflammation<sup>33</sup> quantitative real-time PCR array. No differences were observed between the two genotypes in the expression of *Il17a* and *Il17f*, the IL-17 family members expressed by IL-17-producing T cells (Figure 10E). However, there was an ~2-fold increase in *Il17c* expression in Blk<sup>+/−</sup>.lpr kidneys relative to B6.lpr kidneys (Figure 10E). IL-17C is an IL-17 family member that is expressed by epithelial cells [59], and it can play either a protective or pathogenic role, depending on the model system studied [60]. The only other gene whose expression differed significantly between the two genotypes was *Il23a*, in which we noted an ~2-fold decrease in expression in Blk<sup>+/−</sup>.lpr kidneys compared to B6.lpr kidneys (Figure 10E, data not shown). As IL-23 signaling is required for the expansion and differentiation of unconventional IL-17-producing T cell effectors [61], which in turn drive the development of glomerulonephritis in B6.lpr mice [35], these findings suggest that a reduction in IL-23 production in the kidney alters disease pathogenesis in Blk<sup>+/−</sup>.lpr mice.

**Discussion**

With the completion of both the Human Genome Project and the International HapMap Project, researchers are able to scan

markers across the human genome to identify genes that contribute to complex human diseases, such as SLE [62]. One of the newly identified SLE susceptibility genes is *BLK* [4–10], and SNPs that map to this locus result in a reduction in *BLK* expression [5,11–13]. In this report, we follow-up on the identification of *BLK* as a susceptibility gene by determining whether and how reduced *BLK* expression contributes to SLE disease development. Using the autoimmune-prone B6.lpr mouse model, in which we solely reduced *Blk* expression levels, we noted enhanced proinflammatory cytokine production by both Blk-positive and -negative immune cells in addition to early onset lymphoproliferation, proteinuria, and kidney disease. Together, these findings not only confirm *BLK* as a bona fide susceptibility gene for SLE but also reveal new functions for Blk in immune cell activation and regulation.

Systemic autoimmune disease is the result of synergistic actions of multiple susceptibility genes, with each susceptibility gene making a small contribution to disease development [63]. By analyzing both Blk<sup>+/−</sup> and Blk<sup>+/−</sup>.lpr mice, we are unraveling how reduced Blk expression alters immune cell activation and in turn contributes to the development of autoimmunity. The increased production of IL-6 by B cells and macrophages in 3-month-old

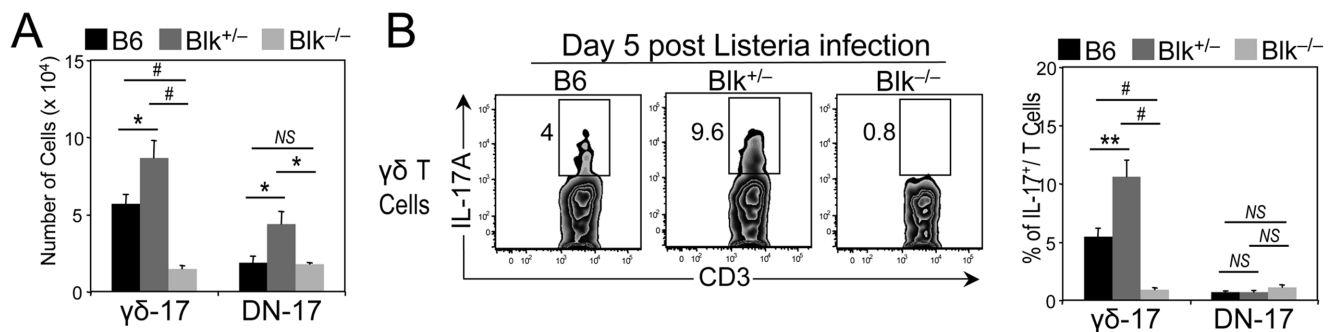

**Figure 9. Different effects of Blk-haploinsufficiency and Blk-deficiency on *in vivo*  $\gamma\delta$ -17 effector function.** (A) Graph comparing numbers of  $\gamma\delta$ -17 and DN-17 cells from B6 (n=8), Blk<sup>+/−</sup> (n=7), and Blk<sup>−/−</sup> (n=6) mice. (B) B6, Blk<sup>+/−</sup> and Blk<sup>−/−</sup> mice were infected with *Listeria monocytogenes*. 5 days later, splenocytes were harvested and  $\gamma\delta$ -17 and DN-17 cells were *in vitro* stimulated for 4 hours with a cocktail of IL-23, IL-1, and Pam<sub>3</sub>Cys in the presence of brefeldin A. Dot plots showing CD3 versus IL-17A expression in gated  $\gamma\delta$  T cells from each of the three genotypes. Adjacent graph compares percentage of IL-17A<sup>+</sup> per T cell subset in B6 (n=10), Blk<sup>+/−</sup> (n=6), and Blk<sup>−/−</sup> (n=6) mice. \* $p \leq 0.05$ ; \*\* $p \leq 0.01$ ; # $p \leq 0.001$ . doi:10.1371/journal.pone.0092054.g009

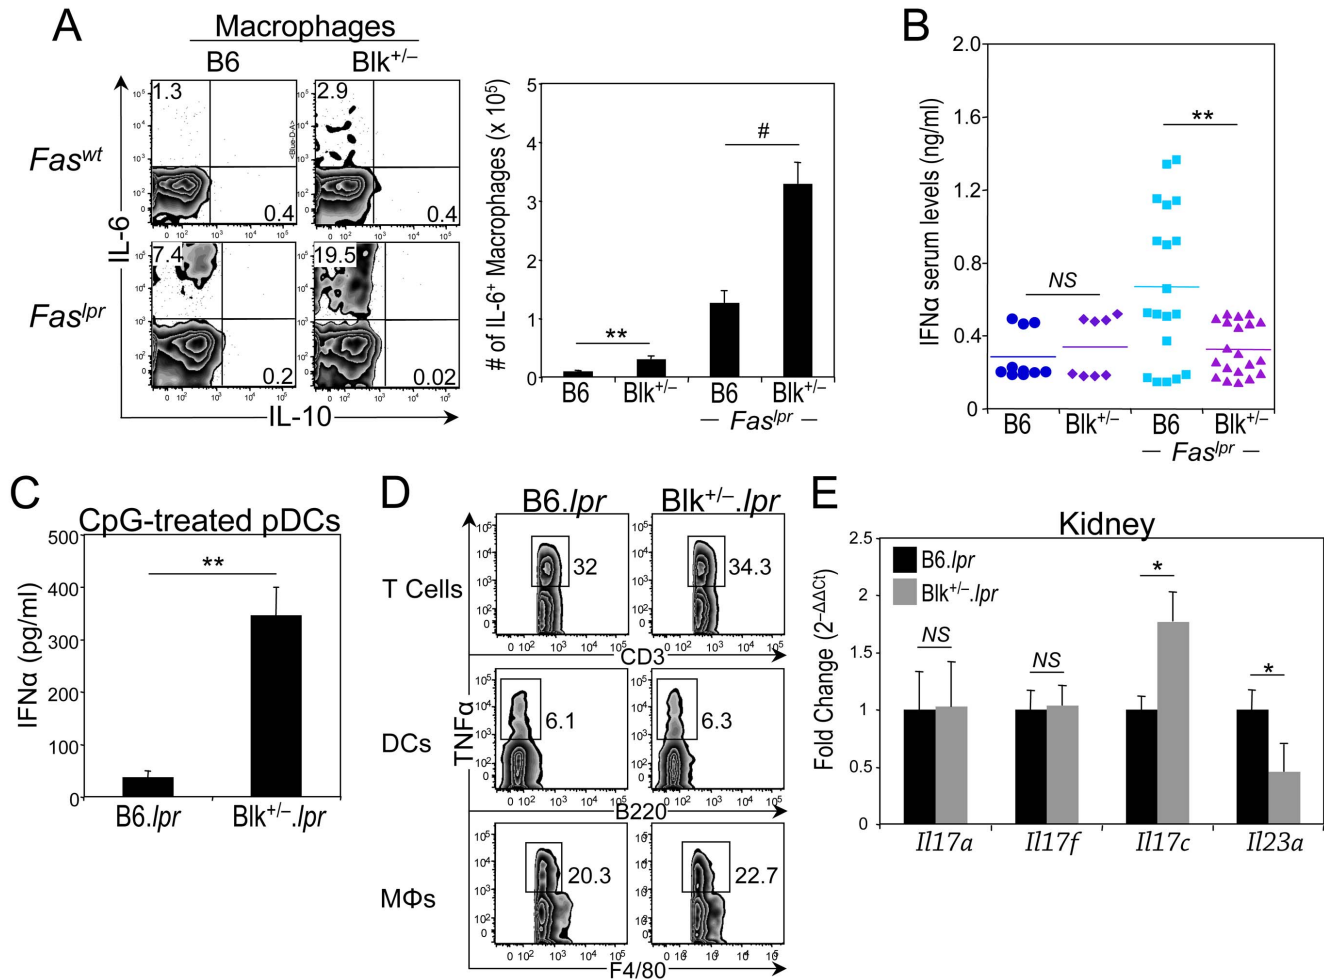

**Figure 10. Reducing *Blk* expression in *B6.lpr* mice affects proinflammatory cytokine production by macrophages, dendritic cells and kidney.** (A) Splenocytes from 3-month-old B6, *Blk*<sup>+/-</sup>, *B6.lpr* and *Blk*<sup>+/-</sup>.*lpr* mice were stimulated with Leukocyte Activation Cocktail for 4 hours. Dot plots showing IL-10 versus IL-6 expression in gated macrophages (F4/80<sup>+</sup> CD3<sup>-</sup> CD19<sup>-</sup>). Numbers represent percentage of IL-6<sup>+</sup> and IL-10<sup>+</sup> cells. Adjacent graph compares the number of IL-6<sup>+</sup> macrophages between 3-month-old B6 (n=4) and *Blk*<sup>+/-</sup> (n=4) mice and between 3-month-old *B6.lpr* (n=7) and *Blk*<sup>+/-</sup>.*lpr* (n=8) mice. (B) Comparison of serum IFNα levels between 3-month-old B6 and *Blk*<sup>+/-</sup> mice and between 3-month-old *B6.lpr* and *Blk*<sup>+/-</sup>.*lpr* mice. Each symbol represents an individual mouse. (C) Purified pDCs from 2-month-old *B6.lpr* (n=3) and *Blk*<sup>+/-</sup>.*lpr* (n=3) mice were stimulated with CpG ODN 2395 for 24 hours and supernatants were collected and assayed for IFNα by ELISA. (D) Splenocytes from 3-month-old *B6.lpr* (n=4) and *Blk*<sup>+/-</sup>.*lpr* mice (n=4) were stimulated with Leukocyte Activation Cocktail for 4 hours. Dot plots showing CD3 versus TNFα expression in gated CD3<sup>+</sup> T cells (top), B220 versus TNFα expression in gated DCs (center), and F4/80 versus TNFα expression in gated macrophages (MΦs) (bottom). Numbers represent percentages of TNFα<sup>+</sup> cells. Very few (≤0.5%) B cells were TNFα<sup>+</sup>. (E) Expression data for *Il17a*, *Il17f*, *Il17c* and *Il23a* from RT<sup>2</sup> profiler array. Data were normalized to *Gapdh* levels and are presented as fold change over 3-month-old *B6.lpr* kidney (set to 1). Data represent 4 to 5 mice per genotype. \**p* ≤ 0.05; \*\**p* ≤ 0.01; #*p* ≤ 0.001. doi:10.1371/journal.pone.0092054.g010

*Blk*<sup>+/-</sup> mice may foster a proinflammatory microenvironment that supports the development and/or maintenance of T cell subsets that have the potential to produce IFNγ, IL-17A, IL-21 and TNFα. Indeed, IL-6 has been shown to play a role in the generation of these cytokine-producing T cells [64–66]. Not until the *Fas*<sup>lpr</sup> mutation is introduced onto the *Blk*<sup>+/-</sup> background, however, do these T cell subsets become activated and secrete their respective cytokines. Enhanced ICOS-ICOSL signaling in the *Blk*<sup>+/-</sup>.*lpr* mouse model may contribute to their differentiation into cytokine-producing effectors at 3 months of age. In *Blk*<sup>+/-</sup>.*lpr* mice, the reduced ICOSL expression on FO B cells combined with the increased ICOS expression on CD4<sup>+</sup> and CD8<sup>+</sup> T cells strongly suggest prior and augmented ICOS-ICOSL signaling [46,48,49]. Interestingly, similar changes in ICOS and ICOSL expression are also observed in SLE patients [49] and in NZB/W

F<sub>1</sub> mice, a lupus mouse model in which ICOS/ICOSL interactions are known to contribute to disease development [46]. Importantly, the interactions between B cells and T cells are reciprocal at this stage, as evidenced by increases in plasma cell numbers and serum IgG levels in *Blk*<sup>+/-</sup>.*lpr* mice compared to *B6.lpr* mice. Eventually, the increased production of TNFα, along with other proinflammatory cytokines, culminates in accelerated onset of proteinuria in 60% of 5-month-old *Blk*<sup>+/-</sup>.*lpr* mice. This high degree of penetrance in our experimental model is striking given that a similar incidence of proteinuria is observed in MRL.lpr mice at 3 to 4 months of age [67] and in NZB/W F<sub>1</sub> mice at 6 to 7 months of age [46].

The vast majority of allelic polymorphisms, on which gene expression studies have been performed, result in a change in protein expression or activity, not a null mutation [5,11,12,68].

Consequently, to study how these allelic polymorphisms increase disease risk, it is critical to use animal models in which gene expression approximates that of the human risk allele(s). This is especially true for *BLK*, as we have discovered a major phenotypic difference between *Blk*<sup>+/-</sup> and *Blk*<sup>-/-</sup> mice, which could have an effect on disease progression and pathogenesis. Even though both  $\gamma\delta$ -17 and DN-17 cells express *Blk*, *Blk*<sup>-/-</sup> mice exhibit a ~75% decrease in  $\gamma\delta$ -17 cell numbers, but no change in DN-17 cell numbers, compared to B6 mice. Surprisingly, instead of observing a phenotype consistent with a gene dosage effect, *Blk*<sup>+/-</sup> mice have ~50% more  $\gamma\delta$ -17 cells and ~100% more DN-17 cells than B6 mice. Moreover, following infection with *Listeria monocytogenes*, which elicits both  $\gamma\delta$ -17 and DN-17 cell responses [61], we found that the percentage of IL-17<sup>+</sup>  $\gamma\delta$  T cells, but not of IL-17<sup>+</sup> DN  $\alpha\beta$  T cells, was significantly greater in infected *Blk*<sup>+/-</sup> mice than in infected B6 mice. By contrast, virtually no IL-17<sup>+</sup>  $\gamma\delta$  T cells were detected in the spleen of infected *Blk*<sup>-/-</sup> mice. Notably, there is a similar bias towards  $\gamma\delta$ -17 cells in *Blk*<sup>+/-</sup>.*lpr* mice, as there are 3-fold more CCR6<sup>+</sup> ROR $\gamma$ t<sup>+</sup>  $\gamma\delta$  T cells than CCR6<sup>+</sup> ROR $\gamma$ t<sup>+</sup> DN  $\alpha\beta$  T cells in *Blk*<sup>+/-</sup>.*lpr* mice yet equivalent numbers of these cells in B6.*lpr* mice. IL-17A has the attributes of a key effector cytokine in the *Blk*<sup>+/-</sup>.*lpr* model, not only because its serum levels are significantly higher in *Blk*<sup>+/-</sup>.*lpr* mice than in B6.*lpr* mice, but also because it is the only T cell cytokine whose serum levels correlate positively with IgG serum levels in *Blk*<sup>+/-</sup>.*lpr* mice ( $r^2 = 0.551$ ;  $p = 0.04$ ). This correlation suggests that IL-17A mediates immunoglobulin class switch and antibody production in our experimental mouse model, which is in agreement with other reports demonstrating a role for IL-17A in IgG production [58,69-71]. Accordingly, if our study of the role of *BLK* in the development of SLE had used *Blk*<sup>-/-</sup>.*lpr* mice, then there would be no functional  $\gamma\delta$ -17 cells and, most likely, no enhanced IL-17A and IgG production at 3 months of age. Importantly, other phenotypes that are observed in 3- and 5-month-old *Blk*<sup>+/-</sup>.*lpr* mice, as a direct or indirect consequence of elevated IL-17A production, may be delayed or may not even occur in *Blk*<sup>-/-</sup>.*lpr* mice.

There are three key steps in the development of systemic autoimmunity, commencing with loss of tolerance to self antigens, progressing to dysregulation of both the innate and adaptive immune systems, and ending with inflammation and tissue damage [1,72,73]. Previous studies, using different mouse models of lupus, have identified susceptibility genes and gene clusters that act at each of the three steps [1,72,73]. Since B cell tolerance is maintained in *Blk*<sup>+/-</sup> 3H9 Tg mice role, we conclude that *BLK* variants do not confer susceptibility to SLE by breaking B cell tolerance to self-antigens and, therefore, do not act at the first step of this model. Our findings, instead, reveal a role for *Blk* in the regulation of a proinflammatory cytokine network, involving cells of both the innate and adaptive immune systems. Such a regulatory function would indicate that *BLK* variants act at the second step in the three-step model. Notably, other genes and gene clusters that are also reported to act at the second step and participate in the dysregulation of innate and adaptive immune cell function include *Fas*, *Lyn*, *Sle2*, *Sle3*, *Tlr7*, and *Ptfn6* [1,72,73].

Since the discovery of *BLK* as a SLE susceptibility gene, SNPs in the *BLK* locus have also been shown to associate with disease risk in systemic sclerosis [74], rheumatoid arthritis [75,76], Sjögren's syndrome [77], and Kawasaki disease [78,79]. The fact that *BLK* risk alleles are shared by multiple autoimmune diseases suggests that the risk alleles promote disease through a common underlying mechanism. We have demonstrated enhanced production of the proinflammatory cytokines IL-6, TNF $\alpha$ , IFN $\gamma$ , IL-17A and IL-21 in *Blk*<sup>+/-</sup>.*lpr* mice compared to age-matched B6.*lpr* mice. Given that each one of these cytokines plays an essential role in disease

development and/or pathogenesis in mouse models of these autoimmune diseases [35,80-88] and that elevated plasma levels of IL-6, TNF $\alpha$ , IL-17A and IL-21 are detected in patients with SLE [89-91], systemic sclerosis [90,92,93], rheumatoid arthritis [90,94-96], Sjögren's syndrome [97-99], and Kawasaki disease [100-102], we propose that dysregulation of a proinflammatory cytokine network is the common mechanism by which *BLK* risk alleles promote autoimmune disease development.

In summary, we have demonstrated that solely reducing *Blk* expression levels in autoimmune-prone B6.*lpr* mice results in elevated proinflammatory cytokine production prior to the onset of proteinuria and nephrosis. Accordingly, we conclude that SNPs in the *BLK* locus increase risk to SLE, and to other autoimmune diseases, through the dysregulation of a proinflammatory cytokine network. Determining the hierarchy and interdependence of the cytokines in this network may lead to new tests for early detection as well as to new therapies that can be implemented in at risk individuals prior to the onset of autoimmune disease.

## Supporting Information

**Figure S1 Comparison of autoimmune phenotypes between 3-month-old and 5-month-old B6.*lpr* and *Blk*<sup>+/-</sup>.*lpr* mice.** (A) Comparison of serum ANA levels between 5-month-old B6.*lpr* and *Blk*<sup>+/-</sup>.*lpr* mice. Each symbol represents an individual mouse. (B) Comparison of the cellularity of the spleen and pLNs between 3-month-old B6.*lpr* and *Blk*<sup>+/-</sup>.*lpr* mice. Each symbol represents an individual mouse. (C) Comparison of serum ANA levels between 3-month-old B6.*lpr* and *Blk*<sup>+/-</sup>.*lpr* mice. Shaded gray band represents range of ANA serum levels in age-matched B6 and *Blk*<sup>+/-</sup> mice. Each symbol represents an individual mouse. (DOCX)

**Figure S2 Enlarged electron micrographs of glomeruli from 5-month-old B6.*lpr* and *Blk*<sup>+/-</sup>.*lpr* mice.** The capillary lumen (denoted as CL) in the B6.*lpr* glomerulus (left panel) is open and red blood cells are visible within the lumen. By contrast, the capillary lumen in the *Blk*<sup>+/-</sup>.*lpr* glomerulus is dramatically narrowed. Rectangular boxes in both panels highlight normal (left panel) and shortened/fused (right panel) podocyte foot processes. Line in bottom of micrographs represents 2  $\mu$ m. (DOCX)

**Figure S3 Effect of reducing *Blk* expression levels on B cell development in B6.*lpr* mice.** (A) Far left panel: Dot plots showing CD19 versus CD93 expression on total splenocytes from 3-month-old B6 (n = 19), *Blk*<sup>+/-</sup> (n = 16), B6.*lpr* (n = 23) and *Blk*<sup>+/-</sup>.*lpr* (n = 27) mice. Numbers in plots represent percentages of transitional (CD19<sup>+</sup> CD93<sup>+</sup>) and mature (CD19<sup>+</sup> CD93<sup>-</sup>) B cells. Left center panel: Dot plots showing CD21 versus CD23 expression on gated mature B cells. Numbers in plots represent percentages of FO B cells (CD23<sup>hi</sup> CD21<sup>lo</sup>), MZ B cells (CD23<sup>lo</sup> CD21<sup>hi</sup>), and pre-plasmablasts (CD23<sup>lo</sup> CD21<sup>lo</sup>). Right two panels: Dot plots showing IgM versus CD5 expression on lymphocytes in the spleen and peritoneal cavity (PEC). Numbers in plots represent percentages of B1 B cells (CD5<sup>lo</sup> IgM<sup>+</sup>). (B) Graphs comparing the percentages of MZ B cells, splenic B1 (B1s) B cells, and pre-plasmablasts (pre-PB) between 3-month-old B6 and *Blk*<sup>+/-</sup> mice and between 3-month-old B6.*lpr* and *Blk*<sup>+/-</sup>.*lpr* mice. (DOCX)

**Figure S4 Effect of reducing *Blk* expression levels on T cell development in B6.*lpr* mice.** (A) Far left panel: Dot plots showing CD3 versus TCR $\beta$  expression on total splenocytes from

3-month-old B6 (n = 19), *Blk*<sup>+/-</sup> (n = 16), *B6.lpr* (n = 23) and *Blk*<sup>+/-</sup>.*lpr* (n = 27) mice. Numbers in plots represent percentages of  $\alpha\beta$  T cells. Left center panel: Dot plots showing CD8 versus CD4 expression on gated  $\alpha\beta$  T cells. Numbers represent percentages of cells in three of the quadrants. Center panel: Histograms showing B220 expression on gated DN  $\alpha\beta$  T cells. Numbers in histograms represent percentage of B220<sup>+</sup> DN  $\alpha\beta$  T cells. Right center panel: Dot plots showing CD3 versus TCR $\gamma\delta$  expression on total splenocytes. Numbers in plots represent percentages of  $\gamma\delta$  T cells. Far right panel: Dot plots showing CD25 versus Foxp3 expression in gated CD4<sup>+</sup>  $\alpha\beta$  T cells. Numbers in plots represent percentages of regulatory T cells. **(B)** Graph comparing the percentages of different T cell subsets between 3-month-old B6 and *Blk*<sup>+/-</sup> mice and between 3-month-old *B6.lpr* and *Blk*<sup>+/-</sup>.*lpr* mice. \*p $\leq$ 0.05; \*\*p $\leq$ 0.01. **(C)** Histograms comparing CD69 expression on gated splenic CD4<sup>+</sup>, CD8<sup>+</sup>, DN  $\alpha\beta$ , and  $\gamma\delta$  T cell subsets from 3-month-old *B6.lpr* and *Blk*<sup>+/-</sup>.*lpr* mice. CD69 expression levels on the corresponding splenic T cell subsets from age-matched B6 mice are

also shown (shaded histogram). **(D)** Dot plots showing CD44 versus CD62L expression on gated CD4<sup>+</sup> splenocytes from 3-month-old B6, *Blk*<sup>+/-</sup>, *B6.lpr* and *Blk*<sup>+/-</sup>.*lpr* mice. Numbers in plots represent percentages of naive (CD62L<sup>hi</sup>CD44<sup>lo</sup>), effector (CD62L<sup>hi</sup>CD44<sup>hi</sup>), and memory (CD62L<sup>lo</sup>CD44<sup>hi</sup>) CD4<sup>+</sup> T cells. (DOCX)

## Acknowledgments

We thank Dr. P. Love for critical review of the manuscript and Drs. A. Tarakhovsky and M.G. Weigert for providing mice.

## Author Contributions

Conceived and designed the experiments: SMH EMS RML. Performed the experiments: EMS RML SMH AMP MFP. Analyzed the data: EMS RML SMH AMP MFP AHT. Contributed reagents/materials/analysis tools: MFP. Wrote the paper: SMH.

## References

- Fairhurst AM, Wandstrat AE, Wakeland EK (2006) Systemic lupus erythematosus: multiple immunological phenotypes in a complex genetic disease. *Adv Immunol* 92: 1–69.
- Krishnan S, Chowdhury B, Tsokos GC (2006) Autoimmunity in systemic lupus erythematosus: Integrating genes and biology. *Sem Immunol* 18: 230–243.
- Morel L (2010) Genetics of SLE: evidence from mouse models. *Nat Rev Rheumatol* 6: 348–357.
- Harley JB, Alarcón-Riquelme ME, Criswell LA, Jacob CO, Kimberly RP, et al. (2008) Genome-wide association scan in women with systemic lupus erythematosus identifies susceptibility variants in *ITGAM*, *PXK*, *KLA1542* and other loci. *Nat Genet* 40: 204–210.
- Hom G, Graham RR, Modrek B, Taylor KE, Ortmann W, et al. (2008) Association of systemic lupus erythematosus with *C8orf13-BLK* and *ITGAM-ITGAX*. *N Engl J Med* 358: 900–909.
- Han JW, Zheng HF, Cui Y, Sun LD, Ye DQ, et al. (2009) Genome-wide association study in a Chinese Han population identifies nine new susceptibility loci for systemic lupus erythematosus. *Nat. Genet* 41: 1234–1237.
- Suarez-Gestal M, Calaza M, Endreffly E, Pullmann R, Ordi-Ros J, et al. (2009) Replication of recently identified systemic lupus erythematosus genetic associations: a case-control study. *Arthritis Res Ther* 11: R69.
- Sánchez E, Comeau ME, Freedman BI, Kelly JA, Kaufman KM, Langefeld CD, et al. (2011) Identification of novel genetic susceptibility loci in African American lupus patients in a candidate gene association study. *Arthritis Rheum* 63: 3493–3501.
- Koga M, Kawasaki A, Ito I, Furuya T, Ohashi J, et al. (2011) Cumulative association of eight susceptibility genes with systemic lupus erythematosus in a Japanese female population. *J Hum Genet* 56: 503–507.
- Järvinen TM, Hellquist A, Zucchelli M, Koskenmies S, Panelius J, et al. (2012) Replication of GWAS-identified systemic lupus erythematosus susceptibility genes affirms B-cell receptor pathway signalling and strengthens the role of IRF5 in disease susceptibility in a Northern European population. *Rheumatology* 51: 87–92.
- Zhang Z, Zhu KJ, Zu Q, Zhang XJ, Sun LD, et al. (2010) The association of the *BLK* gene with SLE was replicated in Chinese Han. *Arch Dermatol Res* 302: 619–624.
- Delgado-Vega AM, Dozmorov MG, Quirós MB, Wu YY, Martínez-García B, et al. (2012) Fine mapping and conditional analysis identify a new mutation in the autoimmune susceptibility gene *BLK* that leads to reduced half-life of the Blk protein. *Ann Rheum Dis* 71: 1219–1226.
- Simpfendorfer KR, Olsson LM, Manjarrez Orduño N, Khalili H, Simeone AM, et al. (2012) The autoimmunity-associated *BLK* haplotype exhibits cis-regulatory effects on mRNA and protein expression that are prominently observed in B cells early in development. *Hum Mol Genet* 21: 3918–3925.
- Dymecki SM, Niederhuber JE, Desiderio SV (1990) Specific expression of a tyrosine kinase gene, *blk*, in B lymphoid cells. *Science* 247: 332–336.
- Texido G, Su IH, Mecklenbraüker I, Saijo K, Malek SN, et al. (2000) The B-cell-specific Src-family kinase Blk is dispensable for B-cell development and activation. *Mol Cell Biol* 20: 1227–1233.
- Saijo K, Schmedt C, Su IH, Karasuyama H, Lowell CA, et al. (2003) Essential role of Src-family protein tyrosine kinases in NF- $\kappa$ B activation during B cell development. *Nat Immunol* 4: 274–279.
- Samuelson EM, Laird RM, Maua AC, Rochford R, Hayes SM (2012) Blk-haplotype deficiency impairs the development, but enhances the functional responses, of MZ B cells. *Immunol Cell Biol* 90: 620–629.
- Lopes-Cavalho T, Kearney JF (2005) Marginal zone B cell physiology and disease. *Curr Dir Autoimmun* 8: 91–123.
- Martin F, Chan AC (2006) B cell immunobiology in disease: evolving concepts from the clinic. *Ann Rev Immunol* 24: 467–496.
- Islam KB, Rabbani H, Larsson C, Sanders R, Smith CIE (1995) Molecular cloning, characterization, and chromosomal localization of human lymphoid tyrosine kinase related to murine Blk. *J Immunol* 154: 1265–1272.
- Cao W, Zhang L, Rosen DR, Bover L, Watanabe G, et al. (2007) BDC2A2/Fc $\epsilon$ R1 $\gamma$  complex signals through a novel BCR-like pathway in human plasmacytoid dendritic cells. *PLoS Biol* 5: e248.
- Borowicz M, Liew CW, Thompson R, Boonyasrisawat W, Hu J, et al. (2009) Mutations at the *BLK* locus linked to maturity onset diabetes of the young and  $\beta$ -cell dysfunction. *Proc Natl Acad Sci USA* 106: 14460–14465.
- Laird RM, Laky K, Hayes SM (2010) Unexpected role for the B cell-specific Src family kinase B lymphoid kinase in the development of IL-17-producing  $\gamma\delta$  T cells. *J Immunol* 185: 6518–6527.
- Adachi M, Watanabe-Fukunaga R, Nagata S (1993) Aberrant transcription caused by the insertion of an early transposable element in an intron of the Fas antigen gene of *lpr* mice. *Proc Natl Acad Sci USA* 90: 1756–1760.
- Izui S, Kelley VE, Masuda K, Yoshida H, Roths JB, et al. (1984) Induction of various autoantibodies by mutant gene *lpr* in several strains of mice. *J Immunol* 133: 227–233.
- Li H, Jiang Y, Prak EL, Radic M, Weigert M (2001) Editors and editing of anti-DNA receptors. *Immunity* 15: 947–957.
- Laird RM, Wolf BJ, Princiotta MF, Hayes SM (2013)  $\gamma\delta$  T cells acquire effector fates in the thymus and differentiate into cytokine-producing effectors in a listeria model of infection independently of CD28 stimulation. *PLoS One* 8: e63178.
- Ivanov II, McKenzie BS, Zhou L, Tadokoro CE, Lepelletier A, et al. (2006) The orphan nuclear receptor ROR $\gamma$ t directs the differentiation program of proinflammatory IL-17<sup>+</sup> T helper cells. *Cell* 126: 1121–1133.
- Calvani N, Tucci M, Richards HB, Tartaglia P, Silvestri F (2005) Th1 cytokines in the pathogenesis of lupus nephritis: the role of IL-18. *Autoimmun Rev* 4: 542–548.
- Craft JE. (2012) Follicular helper T cells in immunity and systemic autoimmunity. *Nat Rev Rheumatol* 8: 337–347.
- Jacob N, Stohl W (2010) Autoantibody-dependent and autoantibody-independent roles for B cells in systemic lupus erythematosus: past, present, and future. *Autoimmunity* 43: 84–97.
- Gillet M, Cao W, Liu YJ (2008) Plasmacytoid dendritic cells: sensing nucleic acids in viral infection and autoimmune diseases. *Nat Rev Immunol* 8: 594–606.
- Korn T, Petermann F (2012) Development and function of interleukin 17-producing  $\gamma\delta$  T cells. *Ann NY Acad Sci* 1247: 34–45.
- D'Acquisto F, Crompton T (2011) CD3<sup>+</sup>CD4<sup>+</sup>CD8<sup>+</sup> T cells: saviours or villains of the immune response. *Biochem Pharmacol* 82: 333–340.
- Kyttaris VC, Zhang Z, Kuchroo VK, Oukka M, Tsokos GC (2010) Cutting Edge: IL-23 receptor deficiency prevents the development of lupus nephritis in C57BL/6-*lpr/lpr* mice. *J Immunol* 184: 4605–4609.
- Kraft SW, Schwartz MM, Korbet SM, Lewis EJ (2005). Glomerular podocytopathy in patients with systemic lupus erythematosus. *J Am Soc Nephrol* 16: 175–179.
- Seshan SV, Jennette JC (2009) Renal disease in systemic lupus erythematosus with emphasis on classification of lupus glomerulonephritis: advances and implications. *Arch Pathol Lab Med* 133: 233–248.
- Gutierrez S, Petiti JP, De Paul AL, Torres AI, Mukdji JH (2012) Lupus-related podocytopathy. Could it be a new entity within the spectrum of lupus nephritis? *Nefrologia* 32: 245–246.

39. Brunskill EW, Georgas K, Rumbaue B, Little MH, Potter SS (2011) Defining the molecular character of the developing and adult kidney podocyte. *PLoS One* 6(9): e24640.
40. Tai G, Hohenstein P, Davies JA (2013) FAK-Src signaling is important to renal collecting duct morphogenesis: discovery using a hierarchical screening technique. *Biol. Open* 2: 416–423.
41. Navarro JF, Mora C, Rivero A, Gallego E, Chahin J, et al. (1999) Urinary protein excretion and serum tumor necrosis factor in diabetic patients with advanced renal failure: effects of pentoxifylline administration. *Am J Kidney Dis* 33: 458–463.
42. Segal R, Dayan M, Zinger H, Mozes E (2001) Suppression of experimental systemic lupus erythematosus (SLE) in mice via TNF inhibition by an anti-TNF $\alpha$  monoclonal antibody and by pentoxifylline. *Lupus* 10: 23–31.
43. Chan OT, Madaio MP, Schlomchik MJ (1999) The central and multiple roles of B cells in lupus pathogenesis. *Immunol Rev* 169: 107–121.
44. Lund FE (2008) Cytokine-producing B lymphocytes – key regulators of immunity. *Curr Opin Immunol* 20: 332–338.
45. Barr TA, Shen P, Brown S, Lampropoulou V, Roch T, et al. (2012) B cell depletion therapy ameliorates autoimmune disease through ablation of IL-6-producing B cells. *J Exp Med* 209: 1001–1010.
46. Watanabe M, Takagi Y, Kotani M, Hara Y, Inamine A, et al. (2008) Down-regulation of ICOS ligand by interaction with ICOS functions as a regulatory mechanism for immune responses. *J Immunol* 180: 5222–5234.
47. Hu H, Wu X, Jin W, Chang M, Cheng X, et al. (2011) Noncanonical NF- $\kappa$ B regulates inducible costimulatory (ICOS) ligand expression and T follicular helper cell development. *Proc Natl Acad Sci USA* 108: 12827–12832.
48. Iwai H, Abe M, Hirose S, Tsushima F, Tezuka K, et al. (2003) Involvement of inducible costimulator-B7 homologous protein costimulatory pathway in murine lupus nephritis. *J Immunol* 171: 2848–2854.
49. Hudloff A, Büchner K, Reiter K, Baelde HJ, Odendahl M, et al. (2004) Involvement of inducible costimulatory in the exaggerated memory B cell and plasma cell generation in systemic lupus erythematosus. *Arthritis Rheum* 50: 3211–3220.
50. Hudloff A, Ditttrich AM, Beier KC, Eljaschewitsch B, Kraft R, et al. (1999) ICOS is an inducible T-cell co-stimulator structurally and functionally related to CD28. *Nature* 397: 263–266.
51. Wassink L, Vieira PL, Smits HH, Kingsbury GA, Coyle AJ, et al. (2004) ICOS expression by activated human Th cells is enhanced by IL-12 and IL-23: increased ICOS expression enhances the effector function of both Th1 and Th2 cells. *J Immunol* 173: 1779–1786.
52. Quiroga MF, Pasquinelli V, Martínez GJ, Jurado JO, Zorilla LC, et al. (2006) Inducible costimulator: a modulator of IFN- $\gamma$  production in human tuberculosis. *J Immunol* 176: 5965–5974.
53. Bauquet AT, Jin H, Paterson AM, Mitsdoerffer M, Ho IC, et al. (2009) The costimulatory molecule ICOS regulates the expression of c-Maf and IL-21 in the development of follicular T helper cells and T<sub>H</sub>-17 cells. *Nat Immunol* 10: 167–175.
54. Choi YS, Kageyama R, Eto D, Escobar TC, Johnston RJ, et al. (2011) ICOS receptor instructs T follicular helper cell versus effector cell differentiation via induction of the transcriptional repressor Bcl6. *Immunity* 34: 932–946.
55. Hamada S, Umemura M, Shiono T, Tanaka K, Yahagi A, et al. (2008) IL-17A produced by  $\gamma\delta$  T cells plays a critical role in innate immunity against *Listeria monocytogenes* infection in the liver. *J Immunol* 181: 3456–3463.
56. Pau E, Cheung YH, Loh C, Lajoie G, Wither JE (2012) TLR tolerance reduces IFN- $\alpha$  production despite plasmacytoid dendritic cell expansion and anti-nuclear antibodies in NZB bicongenic mice. *PLoS One* 7: e36761.
57. Palucka AK, Blanck JP, Bennett L, Pascual V, Banchereau J (2005) Cross-regulation of TNF and IFN- $\alpha$  in autoimmune diseases. *Proc Natl Acad Sci USA* 102: 3372–3377.
58. Pisitkun P, Ha HL, Wang H, Claudio E, Tivy CC, et al. (2012) Interleukin-17 cytokines are critical in development of fatal lupus glomerulonephritis. *Immunity* 37: 1104–1115.
59. Li H, Chen J, Huang A, Stinson J, Heldens S, et al. (2000) Cloning and characterization of IL-17B and IL-17C, two new members of the IL-17 cytokine family. *Proc Natl Acad Sci USA* 97: 773–778.
60. Ramirez-Carrozzi V, Sambandam A, Luis E, Lin Z, Jeet S, et al. (2011) IL-17C regulates the innate immune function of epithelial cells in an autocrine manner. *Nat Immunol* 12: 1159–1166.
61. Riol-Blanco L, Lazarevic V, Awasthi A, Mitsdoerffer M, Wilson BS, et al. 2010. IL-23 receptor regulates unconventional IL-17-producing T cells that control bacterial infections. *J Immunol* 184: 1710–1720.
62. Rai E, Wakeland EK (2011) Genetic predisposition to autoimmunity – what have we learned? *Semin Immunol* 23: 67–83.
63. Morel L, Croker BP, Blemman KR, Mohan C, Huang G, et al. (2000) Genetic reconstitution of systemic lupus erythematosus immunopathology with polycongenic murine strains. *Proc Natl Acad Sci USA* 97: 6670–6675.
64. Yamamoto M, Yoshizaki K, Kishimoto T, Ito H (2000) IL-6 is required for the development of Th1 cell-mediated murine colitis. *J Immunol* 164: 4878–4882.
65. Dienz O, Eaton SM, Bond JP, Neveu W, Moquin D, et al. (2009) The induction of antibody production by IL-6 is indirectly mediated by IL-21 produced by CD4<sup>+</sup> T cells. *J Exp Med* 206: 69–78.
66. Petermann F, Rothhammer V, Claussen MC, Haas JD, Blanco LR, et al. (2010).  $\gamma\delta$  T cell enhance autoimmunity by restraining regulatory T cell responses via an interleukin-23-dependent mechanism. *Immunity* 33: 351–363.
67. Jiang C, Foley J, Clayton N, Kissling G, Jokinen M, et al. (2007) Abrogation of lupus nephritis in activation-induced deaminase-deficient MRL/lpr mice. *J Immunol* 178: 7422–7431.
68. Sille FCM, Thomas R, Smith MT, Conde L, Skibola CF (2012) Post-GWAS functional characterization of susceptibility variants for chronic lymphocytic leukemia. *PLoS One* 7: e29632.
69. Hsu HC, Yang PA, Wang J, Wu Q, Myers R, et al. (2008) Interleukin 17-producing T helper cells and interleukin 17 orchestrate autoreactive germinal center development in autoimmune BXD2 mice. *Nat Immunol* 9: 166–175.
70. Blaho VA, Buczynski MW, Dennis EA, Brown CR (2009) Cyclooxygenase-1 orchestrates germinal center formation and antibody class-switch via regulation of IL-17. *J Immunol* 183: 5644–5653.
71. Mitsdoerffer M, Lee Y, Jäger A, Kim HJ, Korn T, et al. (2010) Proinflammatory T helper type 17 cells are effective B-cell helpers. *Proc Natl Acad Sci USA* 107: 14292–14297.
72. Wakeland EK, Wandstrat AE, Liu K, Morel L (1999) Genetic dissection of systemic lupus erythematosus. *Curr Opin Immunol* 11: 701–707.
73. Wakeland EK, Liu K, Graham RR, Behrens TW (2001) Delineating the genetic basis of systemic lupus erythematosus. *Immunity* 15: 397–408.
74. Gourrh P, Agarwal SK, Martin E, Divecha D, Rueda B, et al. (2010) Association of the *C8orf13-BLK* region with systemic sclerosis in North-American and European populations. *J Autoimmun* 34: 155–162.
75. Gregersen PK, Amos CI, Lee AT, Lu Y, Remmers EF, et al. (2009) *REL*, encoding a member of the NF- $\kappa$ B family of transcription factors, is a newly defined risk locus for rheumatoid arthritis. *Nat Genet* 41: 820–823.
76. Orozco G, Eyre S, Hinks A, Bowes J, Morgan AW, et al. (2010) Study of the common genetic background for rheumatoid arthritis and systemic lupus erythematosus. *Ann Rheum Dis* 70: 463–468.
77. Nordmark G, Kristjansdottir G, Theander E, Appel A, Eriksson P, et al. (2011) Association of *EBF1*, *FAM167A/C8orf13*-*BLK* and *TNFSF4* gene variants with primary Sjogren's syndrome. *Genes Immun* 12: 100–109.
78. Onouchi Y, Ozaki K, Burns JC, Shimizu C, Terai M, et al. (2012) A genome-wide association study identifies three new risk loci for Kawasaki disease. *Nat Genet* 44: 517–521.
79. Lee YC, Kuo HC, Chang JS, Chang LY, Huang LM, et al. (2012) Two new susceptibility loci for Kawasaki disease identified through genome-wide association analysis. *Nat Genet* 44: 522–525.
80. Peng SL, Moslehi J, Craft J (1997) Roles of interferon- $\gamma$  and interleukin-4 in murine lupus. *J Clin Invest* 99: 1936–1946.
81. Ohshima S, Saeki Y, Mima T, Sasai M, Nishioka K, et al. (1998) Interleukin 6 plays a key role in the development of antigen-induced arthritis. *Proc Natl Acad Sci USA* 95: 8222–8226.
82. Young DA, Hegen M, Ma HL, Whitters MJ, Albert LM, et al. (2007) Blockade of the interleukin-21/interleukin-21 receptor pathway ameliorates disease in animal models of rheumatoid arthritis. *Arthritis Rheum* 56: 1152–1163.
83. Koca SS, Isik A, Ozeran IH, Usundag B, Evren B, et al. (2008) Effectiveness of etanercept in bleomycin-induced experimental scleroderma. *Rheumatol* 47: 172–175.
84. Bubier JA, Sproule TJ, Foreman O, Spolski R, Shaffer DJ, et al. (2009) A critical role for IL-21 receptor signaling in the pathogenesis of systemic lupus erythematosus in BXSb-*Yaa* mice. *Proc Natl Acad Sci USA* 106: 1518–1523.
85. Zhang Z, Kyttaris VC, Tsokos GC (2010) The role of IL-23/IL-17 axis in lupus nephritis. *J Immunol* 183: 3160–3169.
86. Cash H, Relle M, Menke J, Brochhausen C, Jones SA, et al. (2010) Interleukin 6 (IL-6) deficiency delays lupus nephritis in MRL-*Fas*<sup>lpr</sup> mice: The IL-6 pathway as a new therapeutic target in treatment of autoimmune kidney disease in systemic lupus erythematosus. *J Rheumatol* 37: 60–70.
87. Rankin AL, Guay H, Herber D, Bertino SA, Duzanski TA, et al. (2012) IL-21 receptor is required for the systemic accumulation of activated B and T lymphocytes in MRL/MpJ-*Fas*<sup>lpr/lpr</sup> mice. *J Immunol* 188: 1656–1667.
88. Simons DM, Oh S, Kropf E, Aitken M, Garcia V, et al. (2013) Autoreactive Th1 cells activate monocytes to support regional Th17 responses in inflammatory arthritis. *J Immunol* 190: 3134–3141.
89. Ohl K, Tenbroeck K (2011) Inflammatory cytokines in systemic lupus erythematosus. *J Biomed Biotech* doi:10.1155/2011/432595.
90. Fina D, Fantini MC, Pallone F, Monteleone G (2006) Role of interleukin-21 in inflammation and allergy. *Inflam Allergy Drug Targ* 6: 63–68.
91. Ma CY, Jiao YL, Zhang J, Yang QR, Zhang ZF, et al. (2012) Elevated plasma levels of HMGB1 are associated with disease activity and combined alterations with IFN- $\alpha$  and TNF- $\alpha$  in systemic lupus erythematosus. *Rheumatol Int* 32: 395–402.
92. Sato SM, Hasegawa M, Takehara K (2001) Serum levels of interleukin-6 and interleukin-10 correlate with total skin thickness score in patients with systemic sclerosis. *J Dermatol Sci* 27: 140–146.
93. Gourrh P, Arnett FC, Assassi S, Tan FK, Huang M, et al. 2009. Plasma cytokine profiles in systemic sclerosis: association with autoantibody subsets and clinical manifestations. *Arthritis Res Ther* 11: R147.
94. Espersen GT, Vestergaard M, Ernst E, Grunnet N (1991) Tumor necrosis factor alpha and interleukin-2 in plasma from rheumatoid arthritis patients in relation to disease activity. *Clin Rheumatol* 10: 374–376.
95. Metsärinne KP, Nordström DC, Kontinen YT, Teppo AM, Fyhrquist FY (1992) Plasma interleukin-6 and renin substrate in reactive arthritis, rheumatoid arthritis, and systemic lupus erythematosus. *Rheumatol Int* 12: 93–96.

96. Brennan F, Beech J (2007) Update on cytokines in rheumatoid arthritis. *Curr Opin Rheum* 19: 296–301.
97. Katsifis GE, Rekka S, Moutsopoulos NM, Pillemer S, Wahl SM (2009) Systemic and local interleukin-17 and linked cytokines associated with Sjögren's syndrome immunopathogenesis. *Am J Pathol* 175: 1167–1177.
98. Kang KY, Kim HO, Kwok SK, Ju JH, Park KS, et al. (2011) Impact of interleukin-21 in the pathogenesis of primary Sjögren's syndrome: increased serum levels of interleukin-21 and its expression in the labial salivary glands. *Arth Res Ther* 13: R179.
99. Cay HF, Sezer I, Dogan S, Felek R, Aslan M (2012) Polymorphism in the TNF- $\alpha$  gene promoter at position -1031 is associated with increased circulating levels of TNF- $\alpha$ , myeloperoxidase and nitrotyrosine in primary Sjögren's syndrome. *Clin Exp Rheumatol* 30: 843–849.
100. Yoshioka T, Matsutani T, Iwagami S, Toyosaki-Maeda T, Yutsudo T, et al. (1999) Polyclonal expansion of TCRBV2- and TCRBV6-bearing T cells in patients with Kawasaki disease. *Immunol* 96: 465–472.
101. Jia S, Li C, Wang G, Yang J, Zu Y (2010) The T helper type 17/regulatory T cell imbalance in patients with acute Kawasaki disease. *Clin Exp Med* 162: 131–137.
102. Bae YJ, Kim MH, Lee HY, Uh Y, Namgoong MK, et al. (2012) Elevated serum levels of IL-21 in Kawasaki Disease. *Allergy Asthma Immunol Res* e125.
